# Supplementary material for: Association between BMI changes and mortality risk in children with end-stage renal disease
Source: Springer Nature journal article supplement (doi:10.1007/s00467-019-04249-z), 2019-04-08
Supplement: MOESM5 [file 16629232]

log using "MMatt's BMI paper.smcl", replace

----------------------------------------------------------------------------------------------------------------------------------------------

name: <unnamed>

log: /Users/elaineku 1/Desktop/AASK stata files/MMatt's BMI paper.smcl

log type: smcl

opened on: 8 Dec 2018, 11:04:07

. /*

> merge m:m myid using "myid.dta"

> keep if _merge ==3

> drop _merge

> */

. //merges in median income data

. destring(zipcode), replace

zipcode: all characters numeric; replaced as long

(31 missing values generated)

. merge m:m zipcode using "/Users/elaineku 1/Desktop/adult USRDS data updated 2016/median income 2006-2010 data.dta", force

Result # of obs.

-----------------------------------------

not matched 31,606

from master 77 (_merge==1)

from using 31,529 (_merge==2)

matched 1,187 (_merge==3)

-----------------------------------------

. drop if _merge ==2

(31,529 observations deleted)

. drop _merge

. rename Median medianincome

. rename Mean meanincome

. drop if bmiz_change_peryr > 4

(6 observations deleted)

. drop if medianincome == .

(76 observations deleted)

.

. //bmiz_lag is the first weight

. //bmiz is a follow upweight

.

. merge m:m myid using "/Users/elaineku 1/Downloads/pedsgrow_modalfl_20172012.dta"

Result # of obs.

-----------------------------------------

not matched 0

matched 1,182 (_merge==3)

-----------------------------------------

. keep if _merge ==3

(0 observations deleted)

. drop _merge

.

. //recategorizes after dropping those without median income

. drop r_bmiz_change_peryr

.

. xtile r_bmiz_change_peryr =bmiz_change_peryr, n(5)

. */

. tab r_bmiz_change_peryr race_pedgrow_n, row freq chi2

+----------------+

| Key |

|----------------|

| frequency |

| row percentage |

+----------------+

5 |

quantiles |

of |

bmiz_chang | race_pedgrow_n

e_peryr | Native Am Asian Black White Unknown Other | Total

-----------+------------------------------------------------------------------+----------

1 | 1 5 54 175 0 2 | 237

| 0.42 2.11 22.78 73.84 0.00 0.84 | 100.00

-----------+------------------------------------------------------------------+----------

2 | 4 8 40 180 3 1 | 236

| 1.69 3.39 16.95 76.27 1.27 0.42 | 100.00

-----------+------------------------------------------------------------------+----------

3 | 5 5 36 189 1 1 | 237

| 2.11 2.11 15.19 79.75 0.42 0.42 | 100.00

-----------+------------------------------------------------------------------+----------

4 | 1 5 39 189 0 2 | 236

| 0.42 2.12 16.53 80.08 0.00 0.85 | 100.00

-----------+------------------------------------------------------------------+----------

5 | 0 4 41 188 1 2 | 236

| 0.00 1.69 17.37 79.66 0.42 0.85 | 100.00

-----------+------------------------------------------------------------------+----------

Total | 11 27 210 921 5 8 | 1,182

| 0.93 2.28 17.77 77.92 0.42 0.68 | 100.00

Pearson chi2(20) = 22.4908 Pr = 0.314

.

. //bmiz_lag is the first bmi

. //bmiz is the second bmi

. //therebore whenbmiz change is negative there is weight gain and when positive it means there is weight gain

. //recategorization of r_bmiz_changeperyr 1 = significant weight loss; 5 = significant weight gain; 3 = reference

.

. /*because the original coding gives large categories of "other cause" and "missing" I recoded it

>

> Recoding is as follows based on pdis_pedgrow primary disease causing ESRD from the patient's file (taken from icd codes based on page 3 of

> 2728 form)

> 1 Diabetes or Hypertension

> 3 Glomeruloneph (excludes FSGS)

> 4 FSGS

> 5 Interstitial nephritis/pyelonephritis/other urological conditions

> 6 Secondary GN/vasculitis

> 7 Other/etiology uncertain/iscellaneous

> 8 Neoplasms'tumor"

> 9 CAKUT

> 11 missing

> */

. gen causeesrd= .

(1,182 missing values generated)

. replace causeesrd = 1 if pdis_pedgrow == "25040" | pdis_pedgrow == "25041"

(1 real change made)

. replace causeesrd = 1 if pdis_pedgrow == "40391" | pdis_pedgrow == "4401" | pdis_pedgrow == "59381" | pdis_pedgrow == "59383"

(4 real changes made)

. replace causeesrd = 3 if pdis_pedgrow == "5829" | pdis_pedgrow == "5831" | pdis_pedgrow == "58321" | pdis_pedgrow == "58322" | pdis_pedgro

> w == "58381" | pdis_pedgrow == "58382" | pdis_pedgrow == "5834" | pdis_pedgrow == "5800" | pdis_pedgrow == "5820"

(44 real changes made)

. replace causeesrd = 3 if pdis_pedgrow == "5821" // to get FSGS count

(65 real changes made)

. replace causeesrd = 9 if pdis_pedgrow == "75313" | pdis_pedgrow == "75314" | pdis_pedgrow == "75316"

(0 real changes made)

. replace causeesrd = 9 if pdis_pedgrow == "75989" | pdis_pedgrow == "75329" | pdis_pedgrow == "7530" | pdis_pedgrow == "75671"

(51 real changes made)

. replace causeesrd = 9 if pdis_pedgrow == "75322"

(0 real changes made)

. replace causeesrd = 9 if pdis_pedgrow == "75321"

(0 real changes made)

. replace causeesrd = 9 if pdis_pedgrow == "7533"

(56 real changes made)

. replace causeesrd = 9 if pdis_pedgrow == "2727"

(0 real changes made)

. replace causeesrd = 9 if pdis_pedgrow == "2718"

(4 real changes made)

. replace causeesrd = 9 if pdis_pedgrow == "2700" | pdis_pedgrow == "5839"

(100 real changes made)

. replace causeesrd = 9 if pdis_pedgrow == "7598" | pdis_pedgrow == "7595"

(13 real changes made)

. replace causeesrd = 9 if pdis_pedgrow == "2700"

(0 real changes made)

. replace causeesrd = 5 if pdis_pedgrow == "9659" | | pdis_pedgrow == "5830" | pdis_pedgrow == "9849" | pdis_pedgrow == "5909" | pdis_pedgrow

> == "27410" | pdis_pedgrow == "5920" | pdis_pedgrow == "5996" | pdis_pedgrow == "5900" | pdis_pedgrow == "58389" | pdis_pedgrow == "58089" |

> pdis_pedgrow == "5929" | pdis_pedgrow == "27549"

(30 real changes made)

. replace causeesrd = 3 if pdis_pedgrow == "7100" | pdis_pedgrow == "2870" | pdis_pedgrow == "7101" | pdis_pedgrow == "28311" | pdis_pedgrow =

> = "4460" | pdis_pedgrow == "4464" | pdis_pedgrow == "58392" | pdis_pedgrow == "44620" | pdis_pedgrow == "44621" | pdis_pedgrow == "58391"

(39 real changes made)

. replace causeesrd = 7 if pdis_pedgrow == "59389" | pdis_pedgrow == "5836" | pdis_pedgrow == "7999" | pdis_pedgrow == "5724" | pdis_pedgrow =

> = "8660" | pdis_pedgrow == "042" | pdis_pedgrow == "64620" | pdis_pedgrow == "28269" | pdis_pedgrow == "28260"

(57 real changes made)

. replace causeesrd = 8 if pdis_pedgrow == "1890" | pdis_pedgrow == "1899" | pdis_pedgrow == "2230" | pdis_pedgrow == "2239" | pdis_pedgrow =

> = "23951" | pdis_pedgrow == "23952" | pdis_pedgrow == "20280" | pdis_pedgrow == "20300" | pdis_pedgrow == " 20308"

(2 real changes made)

. replace causeesrd = 8 if pdis_pedgrow == "2773" | pdis_pedgrow == "99680"| pdis_pedgrow == "99681" | pdis_pedgrow == "99682" | pdis_pedgro

> w == "99683" | pdis_pedgrow == "99684" | pdis_pedgrow == "99685" | pdis_pedgrow == "99686" | pdis_pedgrow == "99687" | pdis_pedgrow == "99

> 689"

(9 real changes made)

. replace causeesrd = 7 if causeesrd == .

(707 real changes made)

. replace causeesrd = 9 if pdis_pedgrow == "5900"

(12 real changes made)

. replace causeesrd = 9 if pdis_pedgrow == "5929"

(0 real changes made)

. replace causeesrd = 9 if pdis_pedgrow == "5920"

(4 real changes made)

. replace causeesrd = 9 if causeesrd == 5

(14 real changes made)

. replace causeesrd = 3 if causeesrd == 6

(0 real changes made)

.

.

.

. *merge m:m myid using "/Users/elaineku 1/Desktop/Matt's project /z1keep_forEK_20181009.dta"

.

. //gen table 1

. gen ageyrs = agemos/12

. drop race

. gen race = 1 if race_pedgrow_n ==4 //white

(261 missing values generated)

. replace race = 2 if race_pedgrow_n == 3 // black

(210 real changes made)

. replace race = 3 if hispanic == "1"

(102 real changes made)

. replace race =4 if race == .

(44 real changes made)

.

. gen agecat = 0 if ageyrs <= 10

(898 missing values generated)

. replace agecat = 1 if ageyrs >10 & ageyrs < 13

(183 real changes made)

. replace agecat = 2 if ageyrs >=13

(715 real changes made)

.

. //ths is for first weight

. sum bmiz_lag, detail

bmiz_lag

-------------------------------------------------------------

Percentiles Smallest

1% -3.657429 -18.86671

5% -2.17777 -10.54747

10% -1.568522 -7.465358 Obs 1,182

25% -.5466832 -6.605805 Sum of Wgt. 1,182

50% .3828805 Mean .2543447

Largest Std. Dev. 1.535992

75% 1.311584 3.386552

90% 1.958684 3.417951 Variance 2.359271

95% 2.257245 3.427391 Skewness -2.431473

99% 2.776782 3.61461 Kurtosis 25.2845

. egen bmiz_cat_byhealth = cut(bmiz_lag), at (-10, -1.64, 1.64, 10) icodes

(2 missing values generated)

.

. egen bmiz_cat_byhealth2 = cut(bmiz), at (-10, -1.64, 1.64, 10) icodes

(1 missing value generated)

.

. gen tx1datecombined = txdate_pedgrow

(132 missing values generated)

. replace tx1datecombined = tx1date if tx1datecombined == .

(83 real changes made)

. replace tx1datecombined = last_date if tx1datecombined == .

(49 real changes made)

.

. replace tottx = tot_tx_pedgrow if tottx == .

(0 real changes made)

.

.

. gen preemptivetx = 1 if first_se_pedgrow == tx1datecombined

(1,120 missing values generated)

. replace preemptivetx = 0 if preemptivetx == .

(1,120 real changes made)

.

. tab preemptivetx, freq

preemptivet |

x | Freq. Percent Cum.

------------+-----------------------------------

0 | 1,120 94.75 94.75

1 | 62 5.25 100.00

------------+-----------------------------------

Total | 1,182 100.00

.

. gen ageattransplant = tx1datecombined - born if tottx != 0

(50 missing values generated)

. gen ageatdialysis = firstdial-born if preemptivetx == 0

(120 missing values generated)

. replace ageatdialysis = first_se_pedgrow-born if ageatdialysis == . & preemptivetx == 0 & ageatdialysis == .

(58 real changes made)

.

.

. *codebook myid if tx1failcombined < wtdat //see if anyone got a second transplant before the second weight there are none

.

. gen first_secombined = first_se

. replace first_secombined = first_se_pedgrow if first_secombined == .

(0 real changes made)

.

. format first_secombined %td

.

. //generates variable to account for how long patient has been on esrd when last weight was measured for descriptive purposes

. gen durationofesrd = (wtdat -first_secombined)/365.25

. sum durationofesrd, detail

durationofesrd

-------------------------------------------------------------

Percentiles Smallest

1% .5174538 -8.320329

5% .7994524 -.3778234

10% 1.034908 -.128679 Obs 1,182

25% 1.878166 .2135524 Sum of Wgt. 1,182

50% 3.578371 Mean 4.230454

Largest Std. Dev. 2.959

75% 5.883641 15.14305

90% 8.709104 15.16496 Variance 8.75568

95% 9.87269 15.75086 Skewness .9359502

99% 13.0924 16.3039 Kurtosis 3.92745

.

.

.

.

. merge m:m myid using "/Users/elaineku 1/Downloads/data_tv_transplant_indicator_20171017(1).dta"

Result # of obs.

-----------------------------------------

not matched 147

from master 0 (_merge==1)

from using 147 (_merge==2)

matched 3,150 (_merge==3)

-----------------------------------------

. keep if _merge ==3

(147 observations deleted)

. drop _merge

.

.

. //current modality of treatment at time of enrollment (dialysis versus transplant) ; 1 = transplant and 0 = dialysis

.

. //the ind_modality_change variables tells you if modality at first weight measurement is different than at second weight measurement

. //time should start at the second measurement

.

. sort myid t1

. by myid: gen currentmode = 0 if tv_transplant_indicator ==0 & _n==1

(2,686 missing values generated)

. sort myid t1

. by myid: replace currentmode = 1 if tv_transplant_indicator ==1 & _n==1 & currentmode == .

(718 real changes made)

.

. sort myid currentmode

. by myid: carryforward currentmode if currentmode == ., replace

currentmode: (1968 real changes made)

.

. codebook currentmode

----------------------------------------------------------------------------------------------------------------------------------------------

currentmode (unlabeled)

----------------------------------------------------------------------------------------------------------------------------------------------

type: numeric (float)

range: [0,1] units: 1

unique values: 2 missing .: 0/3,150

tabulation: Freq. Value

1,240 0

1,910 1

.

. gen crdate_yearonly = year(first_secombined) //gen year from the first_se date

.

.

. //these times are split for time-dependent transplant but this is to get overall time for cox model

. //assume those with missing modality changes is not changed

. replace ind_modality_changefl = 0 if ind_modality_changefl == .

(157 real changes made)

.

. //uses the second height

. merge m:m myid using "/Users/elaineku 1/Desktop/Matt's project /z1keep_forEK_20181022 second height.dta"

Result # of obs.

-----------------------------------------

not matched 0

matched 3,150 (_merge==3)

-----------------------------------------

. drop _merge

.

. //cause of death

. gen causedeath = .

(3,150 missing values generated)

. replace causedeath = 1 if cdeath <"5" & cdeath != ""

(555 real changes made)

. replace causedeath = 1 if cdeath >="26" & cdeath <="30"

(0 real changes made)

. replace causedeath = 1 if cdeath == "36"

(0 real changes made)

. replace causedeath = 1 if cdeath =="23" //cardiac

(0 real changes made)

. replace causedeath = 1 if cdeath == "32"

(0 real changes made)

. replace causedeath = 2 if cdeath >="50" & cdeath < "65" //infectious

(143 real changes made)

. replace causedeath = 2 if cdeath == "74"

(2 real changes made)

. replace causedeath = 2 if cdeath == "10"

(0 real changes made)

. replace causedeath = 2 if cdeath == "12"

(0 real changes made)

. replace causedeath = 2 if cdeath == "13"

(0 real changes made)

. replace causedeath = 3 if cdeath != "" & causedeath == .

(576 real changes made)

. replace causedeath = 3 if cdeath == ""

(1,874 real changes made)

.

. gen diedind = 1 if event_death ==1

(2,650 missing values generated)

. sort usrds_id diedind

. by usrds_id: carryforward diedind if diedind == . , replace

diedind: (721 real changes made)

. replace causedeath = . if diedind != 1

(1,929 real changes made, 1,929 to missing)

.

.

. //model for death

.

. //to get follow up time for death or censoring

. stset t2, failure(event_death ==0 1) id(myid)

id: myid

failure event: event_death == 0 1

obs. time interval: (t2[_n-1], t2]

exit on or before: failure

------------------------------------------------------------------------------

3,150 total observations

1,968 observations begin on or after (first) failure

------------------------------------------------------------------------------

1,182 observations remaining, representing

1,182 subjects

1,182 failures in single-failure-per-subject data

3,762,074 total analysis time at risk and under observation

at risk from t = 0

earliest observed entry t = 0

last observed exit t = 9,108

. stdescribe

failure _d: event_death == 0 1

analysis time _t: t2

id: myid

|-------------- per subject --------------|

Category total mean min median max

------------------------------------------------------------------------------

no. of subjects 1182

no. of records 1182 1 1 1 1

(first) entry time 0 0 0 0

(final) exit time 3182.804 1 2206.5 9108

subjects with gap 0

time on gap if gap 0 . . . .

time at risk 3762074 3182.804 1 2206.5 9108

failures 1182 1 1 1 1

------------------------------------------------------------------------------

. stci, p(25)

failure _d: event_death == 0 1

analysis time _t: t2

id: myid

| no. of

| subjects 25% Std. Err. [95% Conf. Interval]

-------------+-------------------------------------------------------------

total | 1182 714 62.71115 622 859

. stci, p(75)

failure _d: event_death == 0 1

analysis time _t: t2

id: myid

| no. of

| subjects 75% Std. Err. [95% Conf. Interval]

-------------+-------------------------------------------------------------

total | 1182 4976 190.6949 4661 5479

.

. //main models

. stset t2, failure(event_death==1) id(myid)

id: myid

failure event: event_death == 1

obs. time interval: (t2[_n-1], t2]

exit on or before: failure

------------------------------------------------------------------------------

3,150 total observations

0 exclusions

------------------------------------------------------------------------------

3,150 observations remaining, representing

1,182 subjects

500 failures in single-failure-per-subject data

8,201,312 total analysis time at risk and under observation

at risk from t = 0

earliest observed entry t = 0

last observed exit t = 9,111

. stptime

failure _d: event_death == 1

analysis time _t: t2

id: myid

Cohort | person-time failures rate [95% Conf. Interval]

-----------+-----------------------------------------------------------

total | 8201312 500 .00006097 .0000558 .0000666

. //followup time for death only

.

. stdescribe

failure _d: event_death == 1

analysis time _t: t2

id: myid

|-------------- per subject --------------|

Category total mean min median max

------------------------------------------------------------------------------

no. of subjects 1182

no. of records 3150 2.664975 1 3 10

(first) entry time 0 0 0 0

(final) exit time 6938.504 1 8937 9111

subjects with gap 0

time on gap if gap 0 . . . .

time at risk 8201312 6938.504 1 8937 9111

failures 500 .4230118 0 0 1

------------------------------------------------------------------------------

. stci,p(25)

failure _d: event_death == 1

analysis time _t: t2

id: myid

| no. of

| subjects 25% Std. Err. [95% Conf. Interval]

-------------+-------------------------------------------------------------

total | 1182 5598 214.0228 5187 5977

. stci, p(75)

failure _d: event_death == 1

analysis time _t: t2

id: myid

| no. of

| subjects 75% Std. Err. [95% Conf. Interval]

-------------+-------------------------------------------------------------

total | 1182 . . . .

. order usrds_id myid _st _d _t0 _t t1 t2 event_death, first

. browse

. //unadjusted

. stcox ib(3).r_bmiz_change_peryr

failure _d: event_death == 1

analysis time _t: t2

id: myid

Iteration 0: log likelihood = -3392.94

Iteration 1: log likelihood = -3386.9264

Iteration 2: log likelihood = -3386.891

Iteration 3: log likelihood = -3386.891

Refining estimates:

Iteration 0: log likelihood = -3386.891

Cox regression -- Breslow method for ties

No. of subjects = 1,182 Number of obs = 3,150

No. of failures = 500

Time at risk = 8201312

LR chi2(4) = 12.10

Log likelihood = -3386.891 Prob > chi2 = 0.0166

-------------------------------------------------------------------------------------

_t | Haz. Ratio Std. Err. z P>|z| [95% Conf. Interval]

--------------------+----------------------------------------------------------------

r_bmiz_change_peryr |

1 | 1.537167 .2144145 3.08 0.002 1.169472 2.02047

2 | 1.046522 .1564505 0.30 0.761 .7807238 1.402812

4 | 1.260115 .1822603 1.60 0.110 .9490615 1.673117

5 | 1.25476 .1827748 1.56 0.119 .9431269 1.669364

-------------------------------------------------------------------------------------

.

. //this is relationship among those who didn't change modality between two weight measurements

. stcox ib(3).r_bmiz_change_peryr if ind_modality_changefl ==0

failure _d: event_death == 1

analysis time _t: t2

id: myid

Iteration 0: log likelihood = -2971.1625

Iteration 1: log likelihood = -2965.5505

Iteration 2: log likelihood = -2965.5231

Iteration 3: log likelihood = -2965.5231

Refining estimates:

Iteration 0: log likelihood = -2965.5231

Cox regression -- Breslow method for ties

No. of subjects = 1,073 Number of obs = 2,869

No. of failures = 444

Time at risk = 7463892

LR chi2(4) = 11.28

Log likelihood = -2965.5231 Prob > chi2 = 0.0236

-------------------------------------------------------------------------------------

_t | Haz. Ratio Std. Err. z P>|z| [95% Conf. Interval]

--------------------+----------------------------------------------------------------

r_bmiz_change_peryr |

1 | 1.533969 .2241384 2.93 0.003 1.151972 2.042638

2 | 1.04566 .1618419 0.29 0.773 .7720507 1.416234

4 | 1.240284 .1862401 1.43 0.152 .9240714 1.664704

5 | 1.323002 .2087753 1.77 0.076 .9710403 1.802535

-------------------------------------------------------------------------------------

. /*predict keepid if e(sample)==1

> drop if keepid == .

> keep myid

> save "myid.dta", replace

> */

.

. //model 1

. stcox ib(3).r_bmiz_change_peryr ib(1).agecat ib(2).race sex_pedgrow_n ib(9).causeesrd c.medianincome crdate_yearonly

failure _d: event_death == 1

analysis time _t: t2

id: myid

Iteration 0: log likelihood = -3392.94

Iteration 1: log likelihood = -3354.5896

Iteration 2: log likelihood = -3353.8509

Iteration 3: log likelihood = -3353.846

Iteration 4: log likelihood = -3353.846

Refining estimates:

Iteration 0: log likelihood = -3353.846

Cox regression -- Breslow method for ties

No. of subjects = 1,182 Number of obs = 3,150

No. of failures = 500

Time at risk = 8201312

LR chi2(16) = 78.19

Log likelihood = -3353.846 Prob > chi2 = 0.0000

-------------------------------------------------------------------------------------

_t | Haz. Ratio Std. Err. z P>|z| [95% Conf. Interval]

--------------------+----------------------------------------------------------------

r_bmiz_change_peryr |

1 | 1.541432 .2174618 3.07 0.002 1.169065 2.032404

2 | 1.080357 .1632294 0.51 0.609 .8034533 1.452693

4 | 1.315673 .1919098 1.88 0.060 .9885254 1.751087

5 | 1.437365 .2134531 2.44 0.015 1.074388 1.922973

|

agecat |

0 | .7238092 .1122706 -2.08 0.037 .5340643 .9809676

2 | 1.040122 .1320845 0.31 0.757 .8109434 1.334067

|

race |

1 | .8590097 .103247 -1.26 0.206 .6787184 1.087193

3 | .558497 .1160921 -2.80 0.005 .3716085 .8393749

4 | 1.281001 .3179644 1.00 0.318 .7875318 2.08368

|

sex_pedgrow_n | 1.303424 .1196605 2.89 0.004 1.088783 1.560379

|

causeesrd |

1 | .9836121 .7143823 -0.02 0.982 .2369241 4.083555

3 | .9386466 .1523177 -0.39 0.696 .6829272 1.290119

7 | .9375337 .1037939 -0.58 0.560 .7546591 1.164724

8 | 1.50035 .5953564 1.02 0.307 .6893283 3.265572

|

medianincome | .9999905 2.52e-06 -3.77 0.000 .9999856 .9999954

crdate_yearonly | .9485918 .0140847 -3.55 0.000 .9213841 .976603

-------------------------------------------------------------------------------------

. //model 2

. stcox ib(3).r_bmiz_change_peryr  ib(1).agecat ib(2).race sex_pedgrow_n ib(9).c

> auseesrd  c.medianincome  i.bmiz_cat_byhealth c.crdate_yearonly

         failure _d:  event_death == 1

   analysis time _t:  t2

                 id:  myid

Iteration 0:   log likelihood = -3391.7955

Iteration 1:   log likelihood = -3351.6429

Iteration 2:   log likelihood = -3350.7022

Iteration 3:   log likelihood = -3350.6953

Iteration 4:   log likelihood = -3350.6953

Refining estimates:

Iteration 0:   log likelihood = -3350.6953

Cox regression -- Breslow method for ties

No. of subjects =        1,180                  Number of obs    =       3,143

No. of failures =          500

Time at risk    =      8183413

                                                LR chi2(18)      =       82.20

Log likelihood  =   -3350.6953                  Prob > chi2      =      0.0000

-------------------------------------------------------------------------------

           _t | Haz. Ratio   Std. Err.      z    P>|z|     [95% Conf. Interval]

--------------+----------------------------------------------------------------

r_bmiz_chan~r |

           1  |   1.561051   .2239457     3.10   0.002     1.178434    2.067898

           2  |   1.081311   .1647537     0.51   0.608     .8021537    1.457618

           4  |   1.309714   .1937158     1.82   0.068     .9801168    1.750149

           5  |   1.398372    .218978     2.14   0.032     1.028795    1.900713

              |

       agecat |

           0  |   .7277973   .1130642    -2.05   0.041     .5367539    .9868376

           2  |   1.027383   .1310429     0.21   0.832     .8001316    1.319178

              |

         race |

           1  |   .8594498   .1033991    -1.26   0.208     .6789124    1.087996

           3  |   .5449758   .1135296    -2.91   0.004     .3622885    .8197848

           4  |   1.276859   .3170352     0.98   0.325     .7848662    2.077258

              |

sex_pedgrow_n |   1.306129    .120386     2.90   0.004     1.090261    1.564737

              |

    causeesrd |

           1  |   1.020415   .7415428     0.03   0.978     .2455853    4.239856

           3  |   .9559993   .1554426    -0.28   0.782      .695112    1.314802

           7  |   .9431659   .1044518    -0.53   0.597     .7591384    1.171805

           8  |    1.45241   .5779063     0.94   0.348     .6658872    3.167947

              |

 medianincome |   .9999908   2.52e-06    -3.67   0.000     .9999858    .9999957

              |

bmiz_cat_by~h |

           1  |   .7486363   .1136284    -1.91   0.056     .5560004    1.008014

           2  |   .7966213   .1503273    -1.20   0.228     .5503323    1.153132

              |

crdate_year~y |   .9495129    .014089    -3.49   0.000     .9222966    .9775323

-------------------------------------------------------------------------------

.

. //tests for INTERACTION

. // now with first bmi categorized

. stcox ib(3).r_bmiz_change_peryr##i.bmiz_cat_byhealth ib(1).agecat ib(2).race sex_pedgrow_n ib(9).causeesrd c.medianincome crdate_yearon

> ly

failure _d: event_death == 1

analysis time _t: t2

id: myid

Iteration 0: log likelihood = -3391.7955

Iteration 1: log likelihood = -3348.0573

Iteration 2: log likelihood = -3346.799

Iteration 3: log likelihood = -3346.7933

Iteration 4: log likelihood = -3346.7933

Refining estimates:

Iteration 0: log likelihood = -3346.7933

Cox regression -- Breslow method for ties

No. of subjects = 1,180 Number of obs = 3,143

No. of failures = 500

Time at risk = 8183413

LR chi2(26) = 90.00

Log likelihood = -3346.7933 Prob > chi2 = 0.0000

-------------------------------------------------------------------------------------------------------

_t | Haz. Ratio Std. Err. z P>|z| [95% Conf. Interval]

--------------------------------------+----------------------------------------------------------------

r_bmiz_change_peryr |

1 | .5696892 .3510812 -0.91 0.361 .1702432 1.906366

2 | .7688585 .4303244 -0.47 0.639 .2567055 2.302807

4 | .7702287 .4076001 -0.49 0.622 .2730042 2.173052

5 | 1.06282 .4823542 0.13 0.893 .436664 2.586856

|

bmiz_cat_byhealth |

1 | .5433493 .2349382 -1.41 0.158 .2328246 1.268029

2 | .424244 .1952378 -1.86 0.062 .1721437 1.045539

|

r_bmiz_change_peryr#bmiz_cat_byhealth |

1 1 | 2.629335 1.680611 1.51 0.130 .7512375 9.202682

1 2 | 3.665699 2.554071 1.86 0.062 .9355847 14.36251

2 1 | 1.207791 .7118656 0.32 0.749 .3804502 3.834295

2 2 | 2.283533 1.452771 1.30 0.194 .6562622 7.945791

4 1 | 1.60856 .8980997 0.85 0.395 .5385054 4.804902

4 2 | 2.151834 1.333851 1.24 0.216 .6385236 7.251713

5 1 | 1.147561 .5585922 0.28 0.777 .4420189 2.979275

5 2 | 2.638895 2.014865 1.27 0.204 .590891 11.7852

|

agecat |

0 | .7112024 .1109683 -2.18 0.029 .5238187 .9656181

2 | 1.027309 .1314212 0.21 0.833 .7994825 1.320059

|

race |

1 | .8791317 .1065095 -1.06 0.288 .6933113 1.114755

3 | .5563031 .1162262 -2.81 0.005 .36938 .8378179

4 | 1.262198 .3155879 0.93 0.352 .7732164 2.06041

|

sex_pedgrow_n | 1.325631 .1230622 3.04 0.002 1.105104 1.590165

|

causeesrd |

1 | 1.005386 .731572 0.01 0.994 .2415205 4.185159

3 | .9842065 .161227 -0.10 0.923 .7139164 1.356829

7 | .9564905 .1066686 -0.40 0.690 .7686948 1.190165

8 | 1.667906 .678791 1.26 0.209 .7512016 3.703282

|

medianincome | .999991 2.53e-06 -3.54 0.000 .999986 .999996

crdate_yearonly | .9516271 .0141597 -3.33 0.001 .9242753 .9797882

-------------------------------------------------------------------------------------------------------

.

. //test for interaction with second bmi

. stcox ib(3).r_bmiz_change_peryr##i.bmiz_cat_byhealth2 ib(1).agecat ib(2).race sex_pedgrow_n ib(9).causeesrd c.medianincome crdate_yearon

> ly

failure _d: event_death == 1

analysis time _t: t2

id: myid

Iteration 0: log likelihood = -3392.3681

Iteration 1: log likelihood = -3348.6141

Iteration 2: log likelihood = -3347.3631

Iteration 3: log likelihood = -3347.355

Iteration 4: log likelihood = -3347.355

Refining estimates:

Iteration 0: log likelihood = -3347.355

Cox regression -- Breslow method for ties

No. of subjects = 1,181 Number of obs = 3,146

No. of failures = 500

Time at risk = 8192365

LR chi2(26) = 90.03

Log likelihood = -3347.355 Prob > chi2 = 0.0000

--------------------------------------------------------------------------------------------------------

_t | Haz. Ratio Std. Err. z P>|z| [95% Conf. Interval]

---------------------------------------+----------------------------------------------------------------

r_bmiz_change_peryr |

1 | 1.106683 .5088679 0.22 0.826 .4493958 2.725319

2 | .7939142 .4199218 -0.44 0.663 .281547 2.238701

4 | 1.095915 .6363835 0.16 0.875 .3511521 3.420255

5 | .8858174 .5378377 -0.20 0.842 .2694785 2.911819

|

bmiz_cat_byhealth2 |

1 | .6271998 .2713324 -1.08 0.281 .2686385 1.464345

2 | .461474 .212462 -1.68 0.093 .1871782 1.13773

|

r_bmiz_change_peryr#bmiz_cat_byhealth2 |

1 1 | 1.27316 .6244709 0.49 0.622 .4868308 3.329568

1 2 | 1.20114 .9243025 0.24 0.812 .2658131 5.427641

2 1 | 1.183469 .6613745 0.30 0.763 .3957926 3.538716

2 2 | 2.248817 1.422136 1.28 0.200 .651119 7.766902

4 1 | 1.224418 .743919 0.33 0.739 .3721911 4.02804

4 2 | 1.034094 .6813369 0.05 0.959 .2842668 3.761785

5 1 | 1.577304 .994236 0.72 0.470 .4585325 5.425763

5 2 | 1.581277 1.103254 0.66 0.511 .402834 6.207114

|

agecat |

0 | .7235168 .1130656 -2.07 0.038 .5326346 .9828061

2 | 1.009107 .1291891 0.07 0.944 .7851699 1.296913

|

race |

1 | .8835795 .1065551 -1.03 0.305 .6975818 1.11917

3 | .5644143 .1183456 -2.73 0.006 .3742133 .8512883

4 | 1.265552 .3168834 0.94 0.347 .7747231 2.067348

|

sex_pedgrow_n | 1.298666 .120485 2.82 0.005 1.082746 1.557645

|

causeesrd |

1 | .9575612 .6959547 -0.06 0.952 .2304167 3.979414

3 | .9581759 .156535 -0.26 0.794 .695643 1.319788

7 | .9416387 .1047809 -0.54 0.589 .7571237 1.171121

8 | 1.439959 .5756297 0.91 0.362 .6577773 3.152256

|

medianincome | .9999905 2.54e-06 -3.74 0.000 .9999855 .9999955

crdate_yearonly | .9492407 .014003 -3.53 0.000 .9221882 .9770867

--------------------------------------------------------------------------------------------------------

.

. //now with age at second bmi

. stcox ib(3).r_bmiz_change_peryr##ib(1).agecat ib(1).agecat ib(2).race sex_pedgrow_n ib(9).causeesrd c.medianincome crdate_yearonly

failure _d: event_death == 1

analysis time _t: t2

id: myid

Iteration 0: log likelihood = -3392.94

Iteration 1: log likelihood = -3351.7857

Iteration 2: log likelihood = -3350.6877

Iteration 3: log likelihood = -3350.6824

Iteration 4: log likelihood = -3350.6824

Refining estimates:

Iteration 0: log likelihood = -3350.6824

Cox regression -- Breslow method for ties

No. of subjects = 1,182 Number of obs = 3,150

No. of failures = 500

Time at risk = 8201312

LR chi2(24) = 84.52

Log likelihood = -3350.6824 Prob > chi2 = 0.0000

--------------------------------------------------------------------------------------------

_t | Haz. Ratio Std. Err. z P>|z| [95% Conf. Interval]

---------------------------+----------------------------------------------------------------

r_bmiz_change_peryr |

1 | 1.410714 .4837275 1.00 0.316 .7203873 2.762563

2 | .799848 .3114936 -0.57 0.566 .3728333 1.715933

4 | 1.443288 .4958276 1.07 0.285 .7360898 2.829926

5 | 1.427812 .4618097 1.10 0.271 .7574599 2.691427

|

agecat |

0 | .7230043 .2533632 -0.93 0.355 .3637922 1.436906

2 | .9671675 .2549352 -0.13 0.899 .5769442 1.621323

|

r_bmiz_change_peryr#agecat |

1 0 | 1.117186 .5387801 0.23 0.818 .4341306 2.874951

1 2 | 1.112462 .4288838 0.28 0.782 .522546 2.368352

2 0 | 1.126999 .6181461 0.22 0.827 .3846357 3.302158

2 2 | 1.497854 .6467779 0.94 0.349 .6425667 3.491571

4 0 | .6401492 .319325 -0.89 0.371 .2408114 1.701709

4 2 | .9964008 .3873039 -0.01 0.993 .4651249 2.134512

5 0 | 1.23012 .5640108 0.45 0.651 .5008078 3.021509

5 2 | .9097774 .3435619 -0.25 0.802 .4340037 1.907115

|

race |

1 | .852233 .1027827 -1.33 0.185 .6728217 1.079485

3 | .559167 .1167045 -2.79 0.005 .3714379 .8417767

4 | 1.280777 .3192573 0.99 0.321 .7857702 2.087618

|

sex_pedgrow_n | 1.331251 .1232693 3.09 0.002 1.110303 1.596167

|

causeesrd |

1 | 1.043355 .7615211 0.06 0.954 .2495512 4.362191

3 | .9257632 .1512271 -0.47 0.637 .6721292 1.275108

7 | .9253301 .1027189 -0.70 0.484 .7444004 1.150236

8 | 1.445475 .5745777 0.93 0.354 .6632191 3.150387

|

medianincome | .9999903 2.54e-06 -3.84 0.000 .9999853 .9999952

crdate_yearonly | .9484301 .0141573 -3.55 0.000 .9210843 .9765878

--------------------------------------------------------------------------------------------

Test for interaction with sex
 stcox ib(3).r_bmiz_change_peryr##i.sex_pedgrow_n 

         failure _d:  event_death == 1
   analysis time _t:  t2
                 id:  myid

Iteration 0:   log likelihood =   -3392.94
Iteration 1:   log likelihood = -3380.9747
Iteration 2:   log likelihood = -3380.8946
Iteration 3:   log likelihood = -3380.8946
Refining estimates:
Iteration 0:   log likelihood = -3380.8946

Cox regression -- Breslow method for ties

No. of subjects =        1,182                  Number of obs    =       3,150
No. of failures =          500
Time at risk    =      8201312
                                                LR chi2(9)       =       24.09
Log likelihood  =   -3380.8946                  Prob > chi2      =      0.0042

-------------------------------------------------------------------------------
           _t | Haz. Ratio   Std. Err.      z    P>|z|     [95% Conf. Interval]
--------------+----------------------------------------------------------------
r_bmiz_chan~r |
           1  |    1.77689   .3335214     3.06   0.002     1.229958    2.567028
           2  |   1.074195   .2217926     0.35   0.729     .7166924    1.610028
           4  |    1.24616   .2537291     1.08   0.280     .8361066    1.857316
           5  |   1.303877   .2621028     1.32   0.187     .8792852    1.933497
              |
sex_pedgrow_n |
      Female  |   1.438679   .3033504     1.73   0.085     .9516673    2.174917
              |
r_bmiz_chan~r#|
sex_pedgrow_n |
    1#Female  |   .7375892   .2095424    -1.07   0.284     .4226646    1.287162
    2#Female  |   .9780608   .2931913    -0.07   0.941     .5435041    1.760066
    4#Female  |   1.038221   .3003309     0.13   0.897     .5889239    1.830294
    5#Female  |   .9503431   .2776533    -0.17   0.862     .5360341    1.684878
-------------------------------------------------------------------------------

. //now with race

. stcox ib(3).r_bmiz_change_peryr##ib(2).race ib(1).agecat sex_pedgrow_n ib(9).causeesrd c.medianincome crdate_yearonly

failure _d: event_death == 1

analysis time _t: t2

id: myid

Iteration 0: log likelihood = -3392.94

Iteration 1: log likelihood = -3352.2858

Iteration 2: log likelihood = -3351.2717

Iteration 3: log likelihood = -3351.2657

Iteration 4: log likelihood = -3351.2657

Refining estimates:

Iteration 0: log likelihood = -3351.2657

Cox regression -- Breslow method for ties

No. of subjects = 1,182 Number of obs = 3,150

No. of failures = 500

Time at risk = 8201312

LR chi2(28) = 83.35

Log likelihood = -3351.2657 Prob > chi2 = 0.0000

------------------------------------------------------------------------------------------

_t | Haz. Ratio Std. Err. z P>|z| [95% Conf. Interval]

-------------------------+----------------------------------------------------------------

r_bmiz_change_peryr |

1 | 1.406429 .4406203 1.09 0.276 .761105 2.598907

2 | .9379254 .331968 -0.18 0.856 .4687003 1.876901

4 | .9984712 .3534656 -0.00 0.997 .4988896 1.998328

5 | 1.60715 .5313001 1.44 0.151 .8407402 3.072211

|

race |

1 | .7763431 .2209934 -0.89 0.374 .4443765 1.356302

3 | .5719996 .2619312 -1.22 0.223 .2331373 1.403394

4 | 1.120489 .5583956 0.23 0.819 .4219016 2.975801

|

r_bmiz_change_peryr#race |

1 1 | 1.126495 .4012308 0.33 0.738 .5604687 2.26416

1 3 | 1.178612 .7345772 0.26 0.792 .3474194 3.998411

1 4 | .9564688 .7046474 -0.06 0.952 .2257229 4.0529

2 1 | 1.165839 .464442 0.39 0.700 .5339993 2.545286

2 3 | 1.070202 .7093533 0.10 0.918 .2919249 3.923383

2 4 | 1.623832 1.096027 0.72 0.473 .4325252 6.096364

4 1 | 1.469373 .577313 0.98 0.327 .6802949 3.173709

4 3 | .8571172 .619601 -0.21 0.831 .2078335 3.5348

4 4 | .8224993 .7408943 -0.22 0.828 .14073 4.807114

5 1 | .8617595 .3223212 -0.40 0.691 .4140129 1.793735

5 3 | .7682111 .4854228 -0.42 0.676 .2226472 2.650599

5 4 | 1.725964 1.565243 0.60 0.547 .2918055 10.20868

|

agecat |

0 | .7204372 .1122474 -2.10 0.035 .5308539 .9777262

2 | 1.04084 .1326072 0.31 0.753 .8108444 1.336074

|

sex_pedgrow_n | 1.304852 .1205399 2.88 0.004 1.088752 1.563845

|

causeesrd |

1 | .9667269 .7217988 -0.05 0.964 .223749 4.176828

3 | .9309114 .1516158 -0.44 0.660 .6765108 1.280979

7 | .945433 .105211 -0.50 0.614 .760162 1.175859

8 | 1.485499 .5983805 0.98 0.326 .6745221 3.271513

|

medianincome | .9999903 2.57e-06 -3.78 0.000 .9999853 .9999953

crdate_yearonly | .9489391 .0141865 -3.51 0.000 .9215374 .9771556

------------------------------------------------------------------------------------------

. //interaction with initial modality

. stcox ib(3).r_bmiz_change_peryr##i.currentmode ib(1).agecat ib(2).race sex_pedgrow_n ib(9).causeesrd c.medianincome crdate_yearonly

failure _d: event_death == 1

analysis time _t: t2

id: myid

Iteration 0: log likelihood = -3392.94

Iteration 1: log likelihood = -3345.78

Iteration 2: log likelihood = -3344.6158

Iteration 3: log likelihood = -3344.6122

Iteration 4: log likelihood = -3344.6122

Refining estimates:

Iteration 0: log likelihood = -3344.6122

Cox regression -- Breslow method for ties

No. of subjects = 1,182 Number of obs = 3,150

No. of failures = 500

Time at risk = 8201312

LR chi2(21) = 96.66

Log likelihood = -3344.6122 Prob > chi2 = 0.0000

-------------------------------------------------------------------------------------------------

_t | Haz. Ratio Std. Err. z P>|z| [95% Conf. Interval]

--------------------------------+----------------------------------------------------------------

r_bmiz_change_peryr |

1 | 1.41459 .2911878 1.68 0.092 .944961 2.117615

2 | .9412297 .2183039 -0.26 0.794 .5974099 1.482924

4 | 1.238925 .2880596 0.92 0.357 .785478 1.954141

5 | 1.710173 .3856701 2.38 0.017 1.099211 2.660719

|

1.currentmode | .6545264 .1435457 -1.93 0.053 .4258416 1.006019

|

r_bmiz_change_peryr#currentmode |

1 1 | 1.093465 .3106026 0.31 0.753 .6266396 1.908058

2 1 | 1.253417 .3812283 0.74 0.458 .6905605 2.275043

4 1 | 1.132952 .3391246 0.42 0.677 .630119 2.037043

5 1 | .7945276 .2367849 -0.77 0.440 .443031 1.424898

|

agecat |

0 | .7170576 .1118744 -2.13 0.033 .5281419 .9735482

2 | 1.005569 .1287406 0.04 0.965 .7824107 1.292377

|

race |

1 | .9311088 .1137971 -0.58 0.559 .7327728 1.183127

3 | .5546874 .1156775 -2.83 0.005 .3685821 .8347615

4 | 1.360747 .3386964 1.24 0.216 .8354282 2.216386

|

sex_pedgrow_n | 1.272461 .1173725 2.61 0.009 1.062012 1.524614

|

causeesrd |

1 | 1.072822 .7789615 0.10 0.923 .2585126 4.452189

3 | .9476017 .1539359 -0.33 0.740 .6892075 1.302872

7 | .952495 .1056875 -0.44 0.661 .7663278 1.183889

8 | 1.583757 .6327925 1.15 0.250 .7237517 3.465672

|

medianincome | .9999909 2.52e-06 -3.62 0.000 .9999859 .9999958

crdate_yearonly | .9412628 .0140185 -4.06 0.000 .9141841 .9691435

-------------------------------------------------------------------------------------------------

.

. //now stratify by time attributed to transplant versus dialysis //SUPPLEMENTAL TABLE 1

. stcox ib(3).r_bmiz_change_peryr ib(1).agecat ib(2).race sex_pedgrow_n ib(9).causeesrd c.medianincome c.crdate_yearonly if tv_transplant_i

> ndicator==0

failure _d: event_death == 1

analysis time _t: t2

id: myid

Iteration 0: log likelihood = -2127.9477

Iteration 1: log likelihood = -2093.2372

Iteration 2: log likelihood = -2091.8791

Iteration 3: log likelihood = -2091.8526

Iteration 4: log likelihood = -2091.8525

Refining estimates:

Iteration 0: log likelihood = -2091.8525

Cox regression -- Breslow method for ties

No. of subjects = 989 Number of obs = 1,476

No. of failures = 372

Time at risk = 2781011

LR chi2(16) = 72.19

Log likelihood = -2091.8525 Prob > chi2 = 0.0000

-------------------------------------------------------------------------------------

_t | Haz. Ratio Std. Err. z P>|z| [95% Conf. Interval]

--------------------+----------------------------------------------------------------

r_bmiz_change_peryr |

1 | 1.421166 .2374216 2.10 0.035 1.024335 1.97173

2 | .9942636 .176494 -0.03 0.974 .7021062 1.407992

4 | 1.386711 .2335557 1.94 0.052 .9968345 1.929074

5 | 1.441843 .2496243 2.11 0.035 1.026953 2.024349

|

agecat |

0 | .7170897 .1332069 -1.79 0.073 .4982576 1.032032

2 | .9350025 .1344965 -0.47 0.640 .7052949 1.239524

|

race |

1 | 1.449049 .191616 2.80 0.005 1.118211 1.877769

3 | .6354638 .1466341 -1.96 0.049 .4042731 .9988648

4 | 2.714294 .792137 3.42 0.001 1.531944 4.809177

|

sex_pedgrow_n | 1.514805 .1614095 3.90 0.000 1.229299 1.866622

|

causeesrd |

1 | 1.86488 1.382578 0.84 0.401 .4361037 7.974653

3 | .9460532 .1737174 -0.30 0.763 .6601081 1.355864

7 | 1.012972 .1295525 0.10 0.920 .7883777 1.301549

8 | 2.404967 1.031386 2.05 0.041 1.037686 5.573814

|

medianincome | .9999959 3.06e-06 -1.33 0.185 .9999899 1.000002

crdate_yearonly | .9528162 .0166275 -2.77 0.006 .9207779 .9859693

-------------------------------------------------------------------------------------

. stcox ib(3).r_bmiz_change_peryr ib(1).agecat ib(2).race sex_pedgrow_n ib(9).causeesrd c.medianincome c.crdate_yearonly if tv_transplant_i

> ndicator==1

failure _d: event_death == 1

analysis time _t: t2

id: myid

Iteration 0: log likelihood = -813.74751

Iteration 1: log likelihood = -803.26956

Iteration 2: log likelihood = -802.93031

Iteration 3: log likelihood = -802.88624

Iteration 4: log likelihood = -802.87014

Iteration 5: log likelihood = -802.86422

Iteration 6: log likelihood = -802.86204

Iteration 7: log likelihood = -802.86124

Iteration 8: log likelihood = -802.86094

Iteration 9: log likelihood = -802.86083

Iteration 10: log likelihood = -802.86079

Iteration 11: log likelihood = -802.86078

Iteration 12: log likelihood = -802.86077

Iteration 13: log likelihood = -802.86077

Iteration 14: log likelihood = -802.86077

Iteration 15: log likelihood = -802.86077

Iteration 16: log likelihood = -802.86077

Iteration 17: log likelihood = -802.86077

Iteration 18: log likelihood = -802.86077

Iteration 19: log likelihood = -802.86077

Iteration 20: log likelihood = -802.86077

Iteration 21: log likelihood = -802.86077

Iteration 22: log likelihood = -802.86077

Iteration 23: log likelihood = -802.86077

Iteration 24: log likelihood = -802.86077

Iteration 25: log likelihood = -802.86077

Iteration 26: log likelihood = -802.86077

Iteration 27: log likelihood = -802.86077

Iteration 28: log likelihood = -802.86077

Iteration 29: log likelihood = -802.86077

Iteration 30: log likelihood = -802.86077

Refining estimates:

Iteration 0: log likelihood = -802.86077

Iteration 1: log likelihood = -802.86077

Iteration 2: log likelihood = -802.86077

Iteration 3: log likelihood = -802.86077

Iteration 4: log likelihood = -802.86077

Iteration 5: log likelihood = -802.86077

Iteration 6: log likelihood = -802.86077

Cox regression -- Breslow method for ties

No. of subjects = 1,045 Number of obs = 1,674

No. of failures = 128

Time at risk = 5420301

LR chi2(16) = 21.77

Log likelihood = -802.86077 Prob > chi2 = 0.1507

-------------------------------------------------------------------------------------

_t | Haz. Ratio Std. Err. z P>|z| [95% Conf. Interval]

--------------------+----------------------------------------------------------------

r_bmiz_change_peryr |

1 | 1.565553 .4199407 1.67 0.095 .9254296 2.648454

2 | 1.018515 .295256 0.06 0.950 .5770499 1.797716

4 | .9338116 .2787169 -0.23 0.819 .5202345 1.676175

5 | 1.283009 .3709056 0.86 0.389 .7280408 2.261018

|

agecat |

0 | 1.16832 .3545528 0.51 0.608 .6445337 2.117766

2 | 1.214531 .3317127 0.71 0.477 .711096 2.074382

|

race |

1 | .8787979 .2535373 -0.45 0.654 .4992445 1.546909

3 | .4658872 .2430216 -1.46 0.143 .1675973 1.295074

4 | 1.35673 .6724254 0.62 0.538 .5135927 3.583998

|

sex_pedgrow_n | .8925218 .1689494 -0.60 0.548 .615873 1.293441

|

causeesrd |

1 | 2.40e-16 2.20e-08 -0.00 1.000 0 .

3 | 1.033718 .3554269 0.10 0.923 .5269026 2.028027

7 | .9390457 .2086898 -0.28 0.777 .607462 1.451625

8 | .6011308 .6208069 -0.49 0.622 .0794157 4.550214

|

medianincome | .9999906 4.63e-06 -2.04 0.041 .9999815 .9999996

crdate_yearonly | .9246005 .0265756 -2.73 0.006 .8739533 .9781829

-------------------------------------------------------------------------------------

.

. //this is sensitivity analysis for those who did not change modality in between weight measurements Supplemental table 1

. stcox ib(3).r_bmiz_change_peryr if ind_modality_changefl ==0

failure _d: event_death == 1

analysis time _t: t2

id: myid

Iteration 0: log likelihood = -2971.1625

Iteration 1: log likelihood = -2965.5505

Iteration 2: log likelihood = -2965.5231

Iteration 3: log likelihood = -2965.5231

Refining estimates:

Iteration 0: log likelihood = -2965.5231

Cox regression -- Breslow method for ties

No. of subjects = 1,073 Number of obs = 2,869

No. of failures = 444

Time at risk = 7463892

LR chi2(4) = 11.28

Log likelihood = -2965.5231 Prob > chi2 = 0.0236

-------------------------------------------------------------------------------------

_t | Haz. Ratio Std. Err. z P>|z| [95% Conf. Interval]

--------------------+----------------------------------------------------------------

r_bmiz_change_peryr |

1 | 1.533969 .2241384 2.93 0.003 1.151972 2.042638

2 | 1.04566 .1618419 0.29 0.773 .7720507 1.416234

4 | 1.240284 .1862401 1.43 0.152 .9240714 1.664704

5 | 1.323002 .2087753 1.77 0.076 .9710403 1.802535

-------------------------------------------------------------------------------------

. stcox ib(3).r_bmiz_change_peryr ib(1).agecat ib(2).race sex_pedgrow_n ib(9).causeesrd c.medianincome crdate_yearonly if ind_modality_cha

> ngefl ==0

failure _d: event_death == 1

analysis time _t: t2

id: myid

Iteration 0: log likelihood = -2971.1625

Iteration 1: log likelihood = -2936.8313

Iteration 2: log likelihood = -2935.9572

Iteration 3: log likelihood = -2935.9426

Iteration 4: log likelihood = -2935.9426

Refining estimates:

Iteration 0: log likelihood = -2935.9426

Cox regression -- Breslow method for ties

No. of subjects = 1,073 Number of obs = 2,869

No. of failures = 444

Time at risk = 7463892

LR chi2(16) = 70.44

Log likelihood = -2935.9426 Prob > chi2 = 0.0000

-------------------------------------------------------------------------------------

_t | Haz. Ratio Std. Err. z P>|z| [95% Conf. Interval]

--------------------+----------------------------------------------------------------

r_bmiz_change_peryr |

1 | 1.527551 .2261378 2.86 0.004 1.142837 2.041772

2 | 1.086672 .1703868 0.53 0.596 .7991582 1.477625

4 | 1.298015 .1968705 1.72 0.085 .9642232 1.747358

5 | 1.516318 .2430194 2.60 0.009 1.107563 2.075926

|

agecat |

0 | .6972324 .1164095 -2.16 0.031 .502645 .9671496

2 | 1.028914 .1377667 0.21 0.831 .7914204 1.337676

|

race |

1 | .817829 .1044273 -1.57 0.115 .6367572 1.050391

3 | .5620662 .1232469 -2.63 0.009 .3657131 .8638422

4 | 1.076645 .2952583 0.27 0.788 .6289836 1.842915

|

sex_pedgrow_n | 1.259224 .1227486 2.36 0.018 1.040228 1.524326

|

causeesrd |

1 | 1.074349 .7825235 0.10 0.922 .2577243 4.478526

3 | .9208597 .1574262 -0.48 0.630 .6586819 1.287393

7 | .9011304 .1054856 -0.89 0.374 .7163852 1.133519

8 | 1.698475 .7944738 1.13 0.257 .6790528 4.248296

|

medianincome | .9999916 2.65e-06 -3.16 0.002 .9999864 .9999968

crdate_yearonly | .9390865 .0144459 -4.09 0.000 .9111956 .967831

-------------------------------------------------------------------------------------

. stcox ib(3).r_bmiz_change_peryr ib(1).agecat ib(2).race sex_pedgrow_n ib(9).causeesrd c.medianincome c.crdate_yearonly if ind_modality_cha

> ngefl ==0

failure _d: event_death == 1

analysis time _t: t2

id: myid

Iteration 0: log likelihood = -2971.1625

Iteration 1: log likelihood = -2936.8313

Iteration 2: log likelihood = -2935.9572

Iteration 3: log likelihood = -2935.9426

Iteration 4: log likelihood = -2935.9426

Refining estimates:

Iteration 0: log likelihood = -2935.9426

Cox regression -- Breslow method for ties

No. of subjects = 1,073 Number of obs = 2,869

No. of failures = 444

Time at risk = 7463892

LR chi2(16) = 70.44

Log likelihood = -2935.9426 Prob > chi2 = 0.0000

-------------------------------------------------------------------------------------

_t | Haz. Ratio Std. Err. z P>|z| [95% Conf. Interval]

--------------------+----------------------------------------------------------------

r_bmiz_change_peryr |

1 | 1.527551 .2261378 2.86 0.004 1.142837 2.041772

2 | 1.086672 .1703868 0.53 0.596 .7991582 1.477625

4 | 1.298015 .1968705 1.72 0.085 .9642232 1.747358

5 | 1.516318 .2430194 2.60 0.009 1.107563 2.075926

|

agecat |

0 | .6972324 .1164095 -2.16 0.031 .502645 .9671496

2 | 1.028914 .1377667 0.21 0.831 .7914204 1.337676

|

race |

1 | .817829 .1044273 -1.57 0.115 .6367572 1.050391

3 | .5620662 .1232469 -2.63 0.009 .3657131 .8638422

4 | 1.076645 .2952583 0.27 0.788 .6289836 1.842915

|

sex_pedgrow_n | 1.259224 .1227486 2.36 0.018 1.040228 1.524326

|

causeesrd |

1 | 1.074349 .7825235 0.10 0.922 .2577243 4.478526

3 | .9208597 .1574262 -0.48 0.630 .6586819 1.287393

7 | .9011304 .1054856 -0.89 0.374 .7163852 1.133519

8 | 1.698475 .7944738 1.13 0.257 .6790528 4.248296

|

medianincome | .9999916 2.65e-06 -3.16 0.002 .9999864 .9999968

crdate_yearonly | .9390865 .0144459 -4.09 0.000 .9111956 .967831

-------------------------------------------------------------------------------------

.

. //model 2

. stcox ib(3).r_bmiz_change_peryr ib(1).agecat ib(2).race sex_pedgrow_n ib(9).causeesrd c.medianincome i.bmiz_cat_byhealth c.crdate_yearonl

> y

failure _d: event_death == 1

analysis time _t: t2

id: myid

Iteration 0: log likelihood = -3391.7955

Iteration 1: log likelihood = -3351.6429

Iteration 2: log likelihood = -3350.7022

Iteration 3: log likelihood = -3350.6953

Iteration 4: log likelihood = -3350.6953

Refining estimates:

Iteration 0: log likelihood = -3350.6953

Cox regression -- Breslow method for ties

No. of subjects = 1,180 Number of obs = 3,143

No. of failures = 500

Time at risk = 8183413

LR chi2(18) = 82.20

Log likelihood = -3350.6953 Prob > chi2 = 0.0000

-------------------------------------------------------------------------------------

_t | Haz. Ratio Std. Err. z P>|z| [95% Conf. Interval]

--------------------+----------------------------------------------------------------

r_bmiz_change_peryr |

1 | 1.561051 .2239457 3.10 0.002 1.178434 2.067898

2 | 1.081311 .1647537 0.51 0.608 .8021537 1.457618

4 | 1.309714 .1937158 1.82 0.068 .9801168 1.750149

5 | 1.398372 .218978 2.14 0.032 1.028795 1.900713

|

agecat |

0 | .7277973 .1130642 -2.05 0.041 .5367539 .9868376

2 | 1.027383 .1310429 0.21 0.832 .8001316 1.319178

|

race |

1 | .8594498 .1033991 -1.26 0.208 .6789124 1.087996

3 | .5449758 .1135296 -2.91 0.004 .3622885 .8197848

4 | 1.276859 .3170352 0.98 0.325 .7848662 2.077258

|

sex_pedgrow_n | 1.306129 .120386 2.90 0.004 1.090261 1.564737

|

causeesrd |

1 | 1.020415 .7415428 0.03 0.978 .2455853 4.239856

3 | .9559993 .1554426 -0.28 0.782 .695112 1.314802

7 | .9431659 .1044518 -0.53 0.597 .7591384 1.171805

8 | 1.45241 .5779063 0.94 0.348 .6658872 3.167947

|

medianincome | .9999908 2.52e-06 -3.67 0.000 .9999858 .9999957

|

bmiz_cat_byhealth |

1 | .7486363 .1136284 -1.91 0.056 .5560004 1.008014

2 | .7966213 .1503273 -1.20 0.228 .5503323 1.153132

|

crdate_yearonly | .9495129 .014089 -3.49 0.000 .9222966 .9775323

-------------------------------------------------------------------------------------

.

.

. //height stratified models that reviewers wanted to see

. stcox ib(3).r_bmiz_change_peryr if haz < -1.14

failure _d: event_death == 1

analysis time _t: t2

id: myid

Iteration 0: log likelihood = -2532.1996

Iteration 1: log likelihood = -2528.4689

Iteration 2: log likelihood = -2528.4385

Iteration 3: log likelihood = -2528.4385

Refining estimates:

Iteration 0: log likelihood = -2528.4385

Cox regression -- Breslow method for ties

No. of subjects = 878 Number of obs = 2,288

No. of failures = 391

Time at risk = 5959119

LR chi2(4) = 7.52

Log likelihood = -2528.4385 Prob > chi2 = 0.1107

-------------------------------------------------------------------------------------

_t | Haz. Ratio Std. Err. z P>|z| [95% Conf. Interval]

--------------------+----------------------------------------------------------------

r_bmiz_change_peryr |

1 | 1.482625 .2321729 2.51 0.012 1.090779 2.015236

2 | 1.064542 .178168 0.37 0.709 .7668328 1.477831

4 | 1.111844 .1788173 0.66 0.510 .8112328 1.52385

5 | 1.200236 .1960596 1.12 0.264 .8714091 1.653146

-------------------------------------------------------------------------------------

. stcox ib(3).r_bmiz_change_peryr if haz >= -1.14

failure _d: event_death == 1

analysis time _t: t2

id: myid

Iteration 0: log likelihood = -595.43294

Iteration 1: log likelihood = -591.48821

Iteration 2: log likelihood = -591.46531

Iteration 3: log likelihood = -591.46531

Refining estimates:

Iteration 0: log likelihood = -591.46531

Cox regression -- no ties

No. of subjects = 304 Number of obs = 862

No. of failures = 109

Time at risk = 2242193

LR chi2(4) = 7.94

Log likelihood = -591.46531 Prob > chi2 = 0.0940

-------------------------------------------------------------------------------------

_t | Haz. Ratio Std. Err. z P>|z| [95% Conf. Interval]

--------------------+----------------------------------------------------------------

r_bmiz_change_peryr |

1 | 1.889049 .5884754 2.04 0.041 1.025835 3.478636

2 | 1.115033 .3740014 0.32 0.745 .5778031 2.151768

4 | 1.999804 .6639084 2.09 0.037 1.043277 3.83332

5 | 1.558453 .5074095 1.36 0.173 .8232942 2.950071

-------------------------------------------------------------------------------------

. stcox ib(3).r_bmiz_change_peryr##c.haz

failure _d: event_death == 1

analysis time _t: t2

id: myid

Iteration 0: log likelihood = -3392.94

Iteration 1: log likelihood = -3367.9996

Iteration 2: log likelihood = -3367.0122

Iteration 3: log likelihood = -3367.0094

Iteration 4: log likelihood = -3367.0094

Refining estimates:

Iteration 0: log likelihood = -3367.0094

Cox regression -- Breslow method for ties

No. of subjects = 1,182 Number of obs = 3,150

No. of failures = 500

Time at risk = 8201312

LR chi2(9) = 51.86

Log likelihood = -3367.0094 Prob > chi2 = 0.0000

-------------------------------------------------------------------------------------------

_t | Haz. Ratio Std. Err. z P>|z| [95% Conf. Interval]

--------------------------+----------------------------------------------------------------

r_bmiz_change_peryr |

1 | 1.451486 .3648849 1.48 0.138 .8868122 2.375713

2 | 1.078824 .2823177 0.29 0.772 .6459509 1.80178

4 | 1.389898 .3685593 1.24 0.214 .8265511 2.337201

5 | 1.304294 .3432795 1.01 0.313 .7786569 2.184765

|

haz | .8408702 .0491928 -2.96 0.003 .7497764 .9430313

|

r_bmiz_change_peryr#c.haz |

1 | .9613386 .079186 -0.48 0.632 .8180172 1.129771

2 | 1.00393 .0844562 0.05 0.963 .851325 1.183889

4 | 1.049841 .0884488 0.58 0.564 .8900406 1.238331

5 | 1.011905 .0869863 0.14 0.890 .8550037 1.197599

-------------------------------------------------------------------------------------------

. stcox ib(3).r_bmiz_change_peryr ib(1).agecat ib(2).race sex_pedgrow_n ib(9).causeesrd c.medianincome crdate_yearonly if haz < -1.14

failure _d: event_death == 1

analysis time _t: t2

id: myid

Iteration 0: log likelihood = -2532.1996

Iteration 1: log likelihood = -2501.77

Iteration 2: log likelihood = -2501.3948

Iteration 3: log likelihood = -2501.3947

Refining estimates:

Iteration 0: log likelihood = -2501.3947

Cox regression -- Breslow method for ties

No. of subjects = 878 Number of obs = 2,288

No. of failures = 391

Time at risk = 5959119

LR chi2(16) = 61.61

Log likelihood = -2501.3947 Prob > chi2 = 0.0000

-------------------------------------------------------------------------------------

_t | Haz. Ratio Std. Err. z P>|z| [95% Conf. Interval]

--------------------+----------------------------------------------------------------

r_bmiz_change_peryr |

1 | 1.513364 .2400877 2.61 0.009 1.108931 2.065296

2 | 1.104627 .1865363 0.59 0.556 .7933684 1.538

4 | 1.169359 .1900437 0.96 0.336 .8503764 1.607996

5 | 1.421525 .2366451 2.11 0.035 1.025776 1.969955

|

agecat |

0 | .7755666 .1318005 -1.50 0.135 .5558596 1.082114

2 | 1.102968 .1580784 0.68 0.494 .8328522 1.46069

|

race |

1 | .7781301 .1079409 -1.81 0.071 .5928912 1.021244

3 | .5519302 .1256317 -2.61 0.009 .3532903 .8622569

4 | 1.256379 .3598798 0.80 0.426 .7166393 2.202625

|

sex_pedgrow_n | 1.430297 .1500369 3.41 0.001 1.164491 1.756777

|

causeesrd |

1 | .519413 .5308934 -0.64 0.522 .0700644 3.850598

3 | 1.047483 .1953347 0.25 0.804 .7267999 1.50966

7 | .9131617 .1154092 -0.72 0.472 .7128026 1.169839

8 | .9044715 .4716918 -0.19 0.847 .3254498 2.513656

|

medianincome | .9999918 2.83e-06 -2.90 0.004 .9999862 .9999973

crdate_yearonly | .9563622 .0160942 -2.65 0.008 .9253328 .9884322

-------------------------------------------------------------------------------------

. stcox ib(3).r_bmiz_change_peryr ib(1).agecat ib(2).race sex_pedgrow_n ib(9).causeesrd c.medianincome crdate_yearonly if haz >= -1.14

failure _d: event_death == 1

analysis time _t: t2

id: myid

Iteration 0: log likelihood = -595.43294

Iteration 1: log likelihood = -582.46539

Iteration 2: log likelihood = -576.78197

Iteration 3: log likelihood = -576.6075

Iteration 4: log likelihood = -576.60685

Iteration 5: log likelihood = -576.60685

Refining estimates:

Iteration 0: log likelihood = -576.60685

Cox regression -- no ties

No. of subjects = 304 Number of obs = 862

No. of failures = 109

Time at risk = 2242193

LR chi2(16) = 37.65

Log likelihood = -576.60685 Prob > chi2 = 0.0017

-------------------------------------------------------------------------------------

_t | Haz. Ratio Std. Err. z P>|z| [95% Conf. Interval]

--------------------+----------------------------------------------------------------

r_bmiz_change_peryr |

1 | 2.019676 .648755 2.19 0.029 1.076121 3.790552

2 | 1.22976 .4263549 0.60 0.551 .6233197 2.426219

4 | 2.219424 .764387 2.31 0.021 1.130004 4.35914

5 | 1.652633 .5618863 1.48 0.140 .8487357 3.217958

|

agecat |

0 | .4486105 .1915278 -1.88 0.060 .1942948 1.035804

2 | 1.061243 .3061773 0.21 0.837 .6028875 1.868072

|

race |

1 | 1.10211 .2656033 0.40 0.687 .6872102 1.767505

3 | .3535414 .2038994 -1.80 0.071 .1141625 1.094857

4 | 1.194596 .6011262 0.35 0.724 .445546 3.202946

|

sex_pedgrow_n | 1.03717 .2124997 0.18 0.859 .6941479 1.5497

|

causeesrd |

1 | 5.343926 5.992899 1.49 0.135 .5933187 48.13189

3 | .7299351 .2501267 -0.92 0.358 .3729093 1.42878

7 | .9966794 .234144 -0.01 0.989 .628909 1.579513

8 | 7.2601 4.747916 3.03 0.002 2.015018 26.1581

|

medianincome | .9999873 5.66e-06 -2.25 0.025 .9999762 .9999984

crdate_yearonly | 1.014127 .0484397 0.29 0.769 .9234956 1.113653

-------------------------------------------------------------------------------------

. stcox ib(3).r_bmiz_change_peryr##c.haz ib(1).agecat ib(2).race sex_pedgrow_n ib(9).causeesrd c.medianincome crdate_yearonly

failure _d: event_death == 1

analysis time _t: t2

id: myid

Iteration 0: log likelihood = -3392.94

Iteration 1: log likelihood = -3336.4524

Iteration 2: log likelihood = -3334.1374

Iteration 3: log likelihood = -3334.126

Iteration 4: log likelihood = -3334.126

Refining estimates:

Iteration 0: log likelihood = -3334.126

Cox regression -- Breslow method for ties

No. of subjects = 1,182 Number of obs = 3,150

No. of failures = 500

Time at risk = 8201312

LR chi2(21) = 117.63

Log likelihood = -3334.126 Prob > chi2 = 0.0000

-------------------------------------------------------------------------------------------

_t | Haz. Ratio Std. Err. z P>|z| [95% Conf. Interval]

--------------------------+----------------------------------------------------------------

r_bmiz_change_peryr |

1 | 1.424157 .3549676 1.42 0.156 .873772 2.321228

2 | 1.048602 .2739974 0.18 0.856 .6283386 1.749959

4 | 1.4122 .3695224 1.32 0.187 .8456041 2.358443

5 | 1.379734 .3579241 1.24 0.215 .8298138 2.294088

|

haz | .8434138 .0488064 -2.94 0.003 .7529803 .9447085

|

r_bmiz_change_peryr#c.haz |

1 | .9532288 .0773012 -0.59 0.555 .8131483 1.117441

2 | .9789702 .0817892 -0.25 0.799 .8311029 1.153146

4 | 1.039967 .0857197 0.48 0.634 .884828 1.222307

5 | .9941971 .0830001 -0.07 0.944 .8441319 1.17094

|

agecat |

0 | .6907056 .10764 -2.37 0.018 .5089102 .9374427

2 | 1.088077 .1395192 0.66 0.510 .8462796 1.39896

|

race |

1 | .8464978 .1019325 -1.38 0.166 .6685393 1.071827

3 | .5452389 .113417 -2.92 0.004 .3626815 .8196874

4 | 1.214738 .3049223 0.77 0.438 .7427022 1.986782

|

sex_pedgrow_n | 1.408482 .1308045 3.69 0.000 1.174089 1.689669

|

causeesrd |

1 | 1.029412 .75075 0.04 0.968 .2464951 4.299029

3 | 1.012701 .1664746 0.08 0.939 .7337613 1.397679

7 | .9737946 .1091249 -0.24 0.813 .7817725 1.212982

8 | 1.627019 .6488078 1.22 0.222 .7446605 3.554897

|

medianincome | .9999908 2.52e-06 -3.63 0.000 .9999859 .9999958

crdate_yearonly | .9832898 .0157179 -1.05 0.292 .9529608 1.014584

-------------------------------------------------------------------------------------------

. stcox ib(3).r_bmiz_change_peryr ib(1).agecat ib(2).race sex_pedgrow_n ib(9).causeesrd c.medianincome i.bmiz_cat_byhealth c.crdate_yearonly

> if haz < -1.14

failure _d: event_death == 1

analysis time _t: t2

id: myid

Iteration 0: log likelihood = -2531.5865

Iteration 1: log likelihood = -2499.7864

Iteration 2: log likelihood = -2499.3552

Iteration 3: log likelihood = -2499.3551

Refining estimates:

Iteration 0: log likelihood = -2499.3551

Cox regression -- Breslow method for ties

No. of subjects = 877 Number of obs = 2,284

No. of failures = 391

Time at risk = 5950172

LR chi2(18) = 64.46

Log likelihood = -2499.3551 Prob > chi2 = 0.0000

-------------------------------------------------------------------------------------

_t | Haz. Ratio Std. Err. z P>|z| [95% Conf. Interval]

--------------------+----------------------------------------------------------------

r_bmiz_change_peryr |

1 | 1.531665 .2470364 2.64 0.008 1.116547 2.10112

2 | 1.103426 .1875952 0.58 0.563 .7907313 1.539775

4 | 1.159493 .1913949 0.90 0.370 .8390006 1.602412

5 | 1.372206 .2417953 1.80 0.073 .9714708 1.938246

|

agecat |

0 | .7849199 .1336252 -1.42 0.155 .562233 1.095808

2 | 1.087457 .1567265 0.58 0.561 .8198514 1.442411

|

race |

1 | .7898517 .1098052 -1.70 0.090 .6014666 1.037241

3 | .5454477 .1242811 -2.66 0.008 .3489841 .8525124

4 | 1.265658 .3631886 0.82 0.412 .7212048 2.22113

|

sex_pedgrow_n | 1.428999 .1505168 3.39 0.001 1.162451 1.756666

|

causeesrd |

1 | .5372494 .5491442 -0.61 0.543 .0724651 3.983119

3 | 1.065188 .199019 0.34 0.735 .7385641 1.536258

7 | .9179746 .1161343 -0.68 0.499 .7163807 1.176298

8 | .8819269 .4605133 -0.24 0.810 .3169298 2.454156

|

medianincome | .9999919 2.84e-06 -2.85 0.004 .9999864 .9999975

|

bmiz_cat_byhealth |

1 | .7678777 .1244511 -1.63 0.103 .5589031 1.054988

2 | .8147123 .1668018 -1.00 0.317 .5454209 1.216961

|

crdate_yearonly | .9562925 .0160825 -2.66 0.008 .9252851 .9883389

-------------------------------------------------------------------------------------

. stcox ib(3).r_bmiz_change_peryr ib(1).agecat ib(2).race sex_pedgrow_n ib(9).causeesrd c.medianincome i.bmiz_cat_byhealth c.crdate_yearonly

> if haz >=-1.14

failure _d: event_death == 1

analysis time _t: t2

id: myid

Iteration 0: log likelihood = -594.97204

Iteration 1: log likelihood = -581.76761

Iteration 2: log likelihood = -576.0678

Iteration 3: log likelihood = -575.88989

Iteration 4: log likelihood = -575.88919

Iteration 5: log likelihood = -575.88919

Refining estimates:

Iteration 0: log likelihood = -575.88919

Cox regression -- no ties

No. of subjects = 303 Number of obs = 859

No. of failures = 109

Time at risk = 2233241

LR chi2(18) = 38.17

Log likelihood = -575.88919 Prob > chi2 = 0.0037

-------------------------------------------------------------------------------------

_t | Haz. Ratio Std. Err. z P>|z| [95% Conf. Interval]

--------------------+----------------------------------------------------------------

r_bmiz_change_peryr |

1 | 2.071012 .6715909 2.25 0.025 1.096866 3.910313

2 | 1.25762 .4381349 0.66 0.511 .635337 2.489399

4 | 2.261694 .7811217 2.36 0.018 1.149355 4.450548

5 | 1.756841 .612759 1.62 0.106 .8868424 3.480314

|

agecat |

0 | .4320392 .1861521 -1.95 0.051 .1856809 1.005262

2 | 1.075655 .3128587 0.25 0.802 .6082719 1.902167

|

race |

1 | 1.074674 .2593508 0.30 0.765 .6696632 1.724634

3 | .3376784 .1945968 -1.88 0.060 .1091376 1.044798

4 | 1.129108 .5728744 0.24 0.811 .4176975 3.05217

|

sex_pedgrow_n | 1.029359 .2113049 0.14 0.888 .6883887 1.539217

|

causeesrd |

1 | 5.564522 6.227496 1.53 0.125 .6206 49.89351

3 | .7327982 .2522842 -0.90 0.367 .373196 1.438904

7 | .9995118 .2352558 -0.00 0.998 .6301442 1.585389

8 | 7.459686 4.87201 3.08 0.002 2.073914 26.83184

|

medianincome | .9999878 5.67e-06 -2.15 0.032 .9999767 .9999989

|

bmiz_cat_byhealth |

1 | .9809929 .4719059 -0.04 0.968 .3821167 2.518464

2 | 1.143488 .6304837 0.24 0.808 .3880658 3.369439

|

crdate_yearonly | 1.015007 .0488361 0.31 0.757 .9236644 1.115382

-------------------------------------------------------------------------------------

. stcox ib(3).r_bmiz_change_peryr##c.haz ib(1).agecat ib(2).race sex_pedgrow_n ib(9).causeesrd c.medianincome i.bmiz_cat_byhealth c.crdate_y

> earonly

failure _d: event_death == 1

analysis time _t: t2

id: myid

Iteration 0: log likelihood = -3391.7955

Iteration 1: log likelihood = -3334.3717

Iteration 2: log likelihood = -3332.0361

Iteration 3: log likelihood = -3332.0234

Iteration 4: log likelihood = -3332.0234

Refining estimates:

Iteration 0: log likelihood = -3332.0234

Cox regression -- Breslow method for ties

No. of subjects = 1,180 Number of obs = 3,143

No. of failures = 500

Time at risk = 8183413

LR chi2(23) = 119.54

Log likelihood = -3332.0234 Prob > chi2 = 0.0000

-------------------------------------------------------------------------------------------

_t | Haz. Ratio Std. Err. z P>|z| [95% Conf. Interval]

--------------------------+----------------------------------------------------------------

r_bmiz_change_peryr |

1 | 1.459433 .3659057 1.51 0.132 .8928383 2.385588

2 | 1.068329 .280766 0.25 0.801 .6382664 1.788167

4 | 1.429647 .3765753 1.36 0.175 .853137 2.395737

5 | 1.410631 .3715261 1.31 0.191 .8418361 2.363738

|

haz | .842306 .0487581 -2.96 0.003 .7519637 .9435022

|

r_bmiz_change_peryr#c.haz |

1 | .9570909 .0777149 -0.54 0.589 .8162747 1.122199

2 | .9852563 .0824524 -0.18 0.859 .83621 1.160869

4 | 1.044454 .0862474 0.53 0.598 .8883826 1.227944

5 | 1.006559 .084601 0.08 0.938 .8536815 1.186813

|

agecat |

0 | .6925511 .1080279 -2.36 0.019 .5101252 .9402142

2 | 1.079115 .1389806 0.59 0.554 .838379 1.388977

|

race |

1 | .84229 .1014781 -1.42 0.154 .6651351 1.066629

3 | .5325216 .1110482 -3.02 0.003 .3538619 .8013839

4 | 1.209229 .3035744 0.76 0.449 .7392926 1.977885

|

sex_pedgrow_n | 1.411678 .1318609 3.69 0.000 1.175513 1.69529

|

causeesrd |

1 | 1.058176 .7719799 0.08 0.938 .2532643 4.421219

3 | 1.020271 .1677764 0.12 0.903 .7391647 1.408282

7 | .9747624 .1092602 -0.23 0.820 .7825072 1.214253

8 | 1.585172 .6343149 1.15 0.250 .7235414 3.472875

|

medianincome | .9999911 2.53e-06 -3.53 0.000 .9999861 .999996

|

bmiz_cat_byhealth |

1 | .819482 .1255668 -1.30 0.194 .6068933 1.106538

2 | .8842508 .1677844 -0.65 0.517 .609624 1.282593

|

crdate_yearonly | .9831372 .0157104 -1.06 0.287 .9528226 1.014416

-------------------------------------------------------------------------------------------

.

. //censoring within 5 years of follow up - regenerating the time and event rates

. //making a variable such that deaths and change in modality are censored at 5 years

.

. //SUPPLEMENTAL FIGURE DATA //CENSORING AT FIVE YEARS

. /*

> sort myid t1

> gen t2censor = t2

> gen t1censor =t1

> gen event_deathcensor = event_death

> gen ind_modality_changeflcensor = ind_modality_changefl

> by myid: replace t2censor = 1826 if t2censor >=1826 & t2censor != .

> by myid: replace t1censor = 1826 if t1censor > t2censor & t1censor != . & t2censor != .

> by myid: replace event_deathcensor = 0 if t2censor ==1826

> drop if t1censor==t2censor & t1censor == 1826 //five years

>

>

> stset t2censor, failure(event_deathcensor) id(myid)

> order usrds_id myid _st _d _t0 _t t1 t2 event_death, first

> browse

> //unadjusted

> stcox ib(3).r_bmiz_change_peryr

>

> //model 1

> stcox ib(3).r_bmiz_change_peryr ib(1).agecat ib(2).race sex_pedgrow_n ib(9).causeesrd c.medianincome crdate_yearonly

>

> //model 2

> stcox ib(3).r_bmiz_change_peryr ib(1).agecat ib(2).race sex_pedgrow_n ib(9).causeesrd c.medianincome i.bmiz_cat_byhealth c.crdate_yearonly

>

>

> */

. /*predict keepid if e(sample)==1

> drop if keepid == .

> keep myid

> save "myid.dta", replace

> */

.

**. //CENSORING AT TEN YEARS SUPPLEMENTAL FIGURE**

. sort myid t1

. gen t2censor = t2

. gen t1censor =t1

. gen event_deathcensor = event_death

. gen ind_modality_changeflcensor = ind_modality_changefl

. by myid: replace t2censor = 3650 if t2censor >=3650 & t2censor != .

(1817 real changes made)

. by myid: replace t1censor = 3650 if t1censor > t2censor & t1censor != . & t2censor != .

(840 real changes made)

. by myid: replace event_deathcensor = 0 if t2censor ==3650

(324 real changes made)

. drop if t1censor==t2censor & t1censor == 3650 //10 years

(840 observations deleted)

.

.

. stset t2censor, failure(event_deathcensor) id(myid)

id: myid

failure event: event_deathcensor != 0 & event_deathcensor < .

obs. time interval: (t2censor[_n-1], t2censor]

exit on or before: failure

------------------------------------------------------------------------------

2,310 total observations

0 exclusions

------------------------------------------------------------------------------

2,310 observations remaining, representing

1,182 subjects

176 failures in single-failure-per-subject data

3,932,690 total analysis time at risk and under observation

at risk from t = 0

earliest observed entry t = 0

last observed exit t = 3,650

. order usrds_id myid _st _d _t0 _t t1 t2 event_death, first

. browse

. //unadjusted

. stcox ib(3).r_bmiz_change_peryr

failure _d: event_deathcensor

analysis time _t: t2censor

id: myid

Iteration 0: log likelihood = -1228.2613

Iteration 1: log likelihood = -1222.0473

Iteration 2: log likelihood = -1221.8511

Iteration 3: log likelihood = -1221.8507

Refining estimates:

Iteration 0: log likelihood = -1221.8507

Cox regression -- Breslow method for ties

No. of subjects = 1,182 Number of obs = 2,310

No. of failures = 176

Time at risk = 3932690

LR chi2(4) = 12.82

Log likelihood = -1221.8507 Prob > chi2 = 0.0122

-------------------------------------------------------------------------------------

_t | Haz. Ratio Std. Err. z P>|z| [95% Conf. Interval]

--------------------+----------------------------------------------------------------

r_bmiz_change_peryr |

1 | 2.043284 .5619848 2.60 0.009 1.19183 3.503025

2 | 1.782101 .5022099 2.05 0.040 1.025787 3.096047

4 | 2.042655 .56182 2.60 0.009 1.191454 3.501974

5 | 2.388934 .6442999 3.23 0.001 1.4081 4.052983

-------------------------------------------------------------------------------------

.

. //model 1

. stcox ib(3).r_bmiz_change_peryr ib(1).agecat ib(2).race sex_pedgrow_n ib(9).causeesrd c.medianincome crdate_yearonly

failure _d: event_deathcensor

analysis time _t: t2censor

id: myid

Iteration 0: log likelihood = -1228.2613

Iteration 1: log likelihood = -1206.7266

Iteration 2: log likelihood = -1205.6402

Iteration 3: log likelihood = -1205.6258

Iteration 4: log likelihood = -1205.6258

Refining estimates:

Iteration 0: log likelihood = -1205.6258

Cox regression -- Breslow method for ties

No. of subjects = 1,182 Number of obs = 2,310

No. of failures = 176

Time at risk = 3932690

LR chi2(16) = 45.27

Log likelihood = -1205.6258 Prob > chi2 = 0.0001

-------------------------------------------------------------------------------------

_t | Haz. Ratio Std. Err. z P>|z| [95% Conf. Interval]

--------------------+----------------------------------------------------------------

r_bmiz_change_peryr |

1 | 2.129646 .5925196 2.72 0.007 1.234475 3.673943

2 | 1.837656 .5236785 2.14 0.033 1.051227 3.212417

4 | 2.190374 .6086742 2.82 0.005 1.270519 3.776202

5 | 2.876561 .7904585 3.85 0.000 1.678686 4.929215

|

agecat |

0 | .5718027 .150422 -2.12 0.034 .3414474 .9575657

2 | .8870243 .1818838 -0.58 0.559 .5934678 1.325787

|

race |

1 | .8499318 .1718481 -0.80 0.421 .5718463 1.263249

3 | .3117632 .1384959 -2.62 0.009 .1305244 .7446596

4 | 1.861019 .6719443 1.72 0.085 .917094 3.776486

|

sex_pedgrow_n | 1.19039 .1845023 1.12 0.261 .8785341 1.612945

|

causeesrd |

1 | 1.798967 1.853586 0.57 0.569 .2387688 13.55404

3 | 1.116316 .2885839 0.43 0.670 .6725724 1.852828

7 | .9014076 .1674538 -0.56 0.576 .6263169 1.297324

8 | 1.851524 1.125023 1.01 0.311 .5627587 6.091673

|

medianincome | .999997 3.87e-06 -0.77 0.442 .9999894 1.000005

crdate_yearonly | .9415059 .0231025 -2.46 0.014 .8972975 .9878925

-------------------------------------------------------------------------------------

.

. //model 2

. stcox ib(3).r_bmiz_change_peryr ib(1).agecat ib(2).race sex_pedgrow_n ib(9).causeesrd c.medianincome i.bmiz_cat_byhealth c.crdate_yearonly

>

failure _d: event_deathcensor

analysis time _t: t2censor

id: myid

Iteration 0: log likelihood = -1227.9326

Iteration 1: log likelihood = -1204.2048

Iteration 2: log likelihood = -1202.4793

Iteration 3: log likelihood = -1202.4609

Iteration 4: log likelihood = -1202.4609

Refining estimates:

Iteration 0: log likelihood = -1202.4609

Cox regression -- Breslow method for ties

No. of subjects = 1,180 Number of obs = 2,306

No. of failures = 176

Time at risk = 3925390

LR chi2(18) = 50.94

Log likelihood = -1202.4609 Prob > chi2 = 0.0001

-------------------------------------------------------------------------------------

_t | Haz. Ratio Std. Err. z P>|z| [95% Conf. Interval]

--------------------+----------------------------------------------------------------

r_bmiz_change_peryr |

1 | 2.18019 .6162703 2.76 0.006 1.252814 3.79404

2 | 1.842016 .5280581 2.13 0.033 1.050209 3.230805

4 | 2.166297 .6091864 2.75 0.006 1.248392 3.759111

5 | 2.698823 .7772511 3.45 0.001 1.534729 4.745886

|

agecat |

0 | .5783727 .1524929 -2.08 0.038 .3449699 .9696932

2 | .855815 .1768147 -0.75 0.451 .5708451 1.283044

|

race |

1 | .86443 .1752803 -0.72 0.472 .5809408 1.286257

3 | .3008043 .1338913 -2.70 0.007 .1257201 .7197196

4 | 1.84038 .666032 1.69 0.092 .9054371 3.740732

|

sex_pedgrow_n | 1.20671 .1880164 1.21 0.228 .8891564 1.637676

|

causeesrd |

1 | 1.973391 2.03579 0.66 0.510 .2612742 14.90493

3 | 1.181833 .3073573 0.64 0.521 .7098814 1.967554

7 | .9133864 .1696898 -0.49 0.626 .6346255 1.314594

8 | 1.864846 1.133748 1.03 0.305 .5664328 6.139567

|

medianincome | .9999976 3.87e-06 -0.62 0.538 .99999 1.000005

|

bmiz_cat_byhealth |

1 | .5813352 .1299575 -2.43 0.015 .3750944 .9009749

2 | .6829764 .2031246 -1.28 0.200 .3812845 1.223383

|

crdate_yearonly | .944146 .0231617 -2.34 0.019 .8998239 .9906512

-------------------------------------------------------------------------------------

//censoring within 5 years of follow up - regenerating the time and event rates

. //making a variable such that deaths and change in modality are censored at 5 years

.

**. //SUPPLEMENTAL FIGURE DATA //CENSORING AT FIVE YEARS**

.

. sort myid t1

. gen t2censor = t2

. gen t1censor =t1

. gen event_deathcensor = event_death

. gen ind_modality_changeflcensor = ind_modality_changefl

. by myid: replace t2censor = 1826 if t2censor >=1826 & t2censor != .

(2353 real changes made)

. by myid: replace t1censor = 1826 if t1censor > t2censor & t1censor != . & t2censor != .

(1270 real changes made)

. by myid: replace event_deathcensor = 0 if t2censor ==1826

(420 real changes made)

. drop if t1censor==t2censor & t1censor == 1826 //five years

(1,270 observations deleted)

.

.

. stset t2censor, failure(event_deathcensor) id(myid)

id: myid

failure event: event_deathcensor != 0 & event_deathcensor < .

obs. time interval: (t2censor[_n-1], t2censor]

exit on or before: failure

------------------------------------------------------------------------------

1,880 total observations

0 exclusions

------------------------------------------------------------------------------

1,880 observations remaining, representing

1,182 subjects

80 failures in single-failure-per-subject data

2,057,303 total analysis time at risk and under observation

at risk from t = 0

earliest observed entry t = 0

last observed exit t = 1,826

. order usrds_id myid _st _d _t0 _t t1 t2 event_death, first

. browse

. //unadjusted

. stcox ib(3).r_bmiz_change_peryr

failure _d: event_deathcensor

analysis time _t: t2censor

id: myid

Iteration 0: log likelihood = -562.3705

Iteration 1: log likelihood = -560.82224

Iteration 2: log likelihood = -560.79853

Iteration 3: log likelihood = -560.79852

Refining estimates:

Iteration 0: log likelihood = -560.79852

Cox regression -- Breslow method for ties

No. of subjects = 1,182 Number of obs = 1,880

No. of failures = 80

Time at risk = 2057303

LR chi2(4) = 3.14

Log likelihood = -560.79852 Prob > chi2 = 0.5340

-------------------------------------------------------------------------------------

_t | Haz. Ratio Std. Err. z P>|z| [95% Conf. Interval]

--------------------+----------------------------------------------------------------

r_bmiz_change_peryr |

1 | 1.480022 .5796892 1.00 0.317 .6868674 3.189066

2 | 1.582092 .6121993 1.19 0.236 .7410624 3.377605

4 | 1.476201 .5781936 0.99 0.320 .685093 3.180837

5 | 1.896747 .7120094 1.71 0.088 .9088278 3.95856

-------------------------------------------------------------------------------------

.

. //model 1

. stcox ib(3).r_bmiz_change_peryr ib(1).agecat ib(2).race sex_pedgrow_n ib(9).causeesrd c.medianincome crdate_yearonly

failure _d: event_deathcensor

analysis time _t: t2censor

id: myid

Iteration 0: log likelihood = -562.3705

Iteration 1: log likelihood = -550.87778

Iteration 2: log likelihood = -549.43648

Iteration 3: log likelihood = -549.36353

Iteration 4: log likelihood = -549.34797

Iteration 5: log likelihood = -549.34226

Iteration 6: log likelihood = -549.34016

Iteration 7: log likelihood = -549.33939

Iteration 8: log likelihood = -549.3391

Iteration 9: log likelihood = -549.339

Iteration 10: log likelihood = -549.33896

Iteration 11: log likelihood = -549.33894

Iteration 12: log likelihood = -549.33894

Iteration 13: log likelihood = -549.33894

Iteration 14: log likelihood = -549.33894

Iteration 15: log likelihood = -549.33894

Iteration 16: log likelihood = -549.33894

Iteration 17: log likelihood = -549.33894

Iteration 18: log likelihood = -549.33894

Iteration 19: log likelihood = -549.33894

Iteration 20: log likelihood = -549.33894

Iteration 21: log likelihood = -549.33894

Iteration 22: log likelihood = -549.33894

Iteration 23: log likelihood = -549.33894

Iteration 24: log likelihood = -549.33894

Iteration 25: log likelihood = -549.33894

Iteration 26: log likelihood = -549.33894

Iteration 27: log likelihood = -549.33894

Iteration 28: log likelihood = -549.33894

Iteration 29: log likelihood = -549.33894

Iteration 30: log likelihood = -549.33894

Refining estimates:

Iteration 0: log likelihood = -549.33894

Iteration 1: log likelihood = -549.33894

Cox regression -- Breslow method for ties

No. of subjects = 1,182 Number of obs = 1,880

No. of failures = 80

Time at risk = 2057303

LR chi2(16) = 26.06

Log likelihood = -549.33894 Prob > chi2 = 0.0531

-------------------------------------------------------------------------------------

_t | Haz. Ratio Std. Err. z P>|z| [95% Conf. Interval]

--------------------+----------------------------------------------------------------

r_bmiz_change_peryr |

1 | 1.503211 .5927977 1.03 0.301 .693977 3.256079

2 | 1.55807 .6069275 1.14 0.255 .7261251 3.3432

4 | 1.575217 .6220422 1.15 0.250 .7264515 3.415654

5 | 2.320644 .8875681 2.20 0.028 1.096611 4.910938

|

agecat |

0 | .692927 .2624785 -0.97 0.333 .3298034 1.455861

2 | .8570185 .2615947 -0.51 0.613 .4711629 1.558868

|

race |

1 | .5928367 .1666186 -1.86 0.063 .341745 1.028414

3 | .1971053 .1466525 -2.18 0.029 .0458541 .8472642

4 | 2.101075 .9666344 1.61 0.107 .8527706 5.176676

|

sex_pedgrow_n | 1.071567 .2480561 0.30 0.765 .6807311 1.686799

|

causeesrd |

1 | 4.84e-14 3.71e-07 -0.00 1.000 0 .

3 | .7622946 .3072964 -0.67 0.501 .3459285 1.679807

7 | .750392 .1958507 -1.10 0.271 .4499108 1.251555

8 | .8544284 .8837847 -0.15 0.879 .1125197 6.488176

|

medianincome | .9999957 5.76e-06 -0.75 0.453 .9999844 1.000007

crdate_yearonly | .9166525 .0331939 -2.40 0.016 .8538488 .9840756

-------------------------------------------------------------------------------------

.

. //model 2

. stcox ib(3).r_bmiz_change_peryr ib(1).agecat ib(2).race sex_pedgrow_n ib(9).causeesrd c.medianincome i.bmiz_cat_byhealth c.crdate_yearonly

>

failure _d: event_deathcensor

analysis time _t: t2censor

id: myid

Iteration 0: log likelihood = -562.22869

Iteration 1: log likelihood = -549.56723

Iteration 2: log likelihood = -547.51033

Iteration 3: log likelihood = -547.43653

Iteration 4: log likelihood = -547.42194

Iteration 5: log likelihood = -547.41659

Iteration 6: log likelihood = -547.41462

Iteration 7: log likelihood = -547.41389

Iteration 8: log likelihood = -547.41363

Iteration 9: log likelihood = -547.41353

Iteration 10: log likelihood = -547.41349

Iteration 11: log likelihood = -547.41348

Iteration 12: log likelihood = -547.41347

Iteration 13: log likelihood = -547.41347

Iteration 14: log likelihood = -547.41347

Iteration 15: log likelihood = -547.41347

Iteration 16: log likelihood = -547.41347

Iteration 17: log likelihood = -547.41347

Iteration 18: log likelihood = -547.41347

Iteration 19: log likelihood = -547.41347

Iteration 20: log likelihood = -547.41347

Iteration 21: log likelihood = -547.41347

Iteration 22: log likelihood = -547.41347

Iteration 23: log likelihood = -547.41347

Iteration 24: log likelihood = -547.41347

Iteration 25: log likelihood = -547.41347

Iteration 26: log likelihood = -547.41347

Iteration 27: log likelihood = -547.41347

Iteration 28: log likelihood = -547.41347

Iteration 29: log likelihood = -547.41347

Refining estimates:

Iteration 0: log likelihood = -547.41347

Iteration 1: log likelihood = -547.41347

Iteration 2: log likelihood = -547.41347

Cox regression -- Breslow method for ties

No. of subjects = 1,180 Number of obs = 1,877

No. of failures = 80

Time at risk = 2053651

LR chi2(18) = 29.63

Log likelihood = -547.41347 Prob > chi2 = 0.0412

-------------------------------------------------------------------------------------

_t | Haz. Ratio Std. Err. z P>|z| [95% Conf. Interval]

--------------------+----------------------------------------------------------------

r_bmiz_change_peryr |

1 | 1.522937 .6090056 1.05 0.293 .6954983 3.334786

2 | 1.529165 .5985855 1.09 0.278 .7099943 3.293471

4 | 1.521035 .6081199 1.05 0.294 .6947417 3.330084

5 | 2.042056 .8238564 1.77 0.077 .9260939 4.502775

|

agecat |

0 | .7066292 .2681801 -0.91 0.360 .3358484 1.486757

2 | .812761 .2504613 -0.67 0.501 .4442788 1.48686

|

race |

1 | .6194848 .1752997 -1.69 0.091 .3557628 1.0787

3 | .1933438 .1440017 -2.21 0.027 .0449116 .8323419

4 | 2.137907 .9881608 1.64 0.100 .8640827 5.289592

|

sex_pedgrow_n | 1.084746 .2524465 0.35 0.727 .6874369 1.711682

|

causeesrd |

1 | 4.98e-14 3.94e-07 -0.00 1.000 0 .

3 | .8160802 .3311136 -0.50 0.616 .368442 1.807576

7 | .7532088 .1964772 -1.09 0.277 .4517274 1.255898

8 | .8906062 .9210155 -0.11 0.911 .117333 6.760069

|

medianincome | .9999963 5.77e-06 -0.65 0.519 .999985 1.000008

|

bmiz_cat_byhealth |

1 | .5317977 .1702909 -1.97 0.049 .2839075 .9961301

2 | .5819268 .2508485 -1.26 0.209 .2500028 1.35454

|

crdate_yearonly | .9205214 .0333061 -2.29 0.022 .8575035 .9881705

-------------------------------------------------------------------------------------

. duplicates drop myid, force

Duplicates in terms of myid

(1,968 observations deleted)

. //table 1

. tab agecat

agecat | Freq. Percent Cum.

------------+-----------------------------------

0 | 284 24.03 24.03

1 | 183 15.48 39.51

2 | 715 60.49 100.00

------------+-----------------------------------

Total | 1,182 100.00

.

. sum ageyrs, detail

ageyrs

-------------------------------------------------------------

Percentiles Smallest

1% 3.5 2.833333

5% 5.083333 2.916667

10% 6.5 2.916667 Obs 1,182

25% 10.16667 2.916667 Sum of Wgt. 1,182

50% 14.58333 Mean 13.63388

Largest Std. Dev. 4.576938

75% 17.66667 19.91667

90% 18.91667 19.91667 Variance 20.94836

95% 19.41667 19.91667 Skewness -.5535223

99% 19.83333 19.91667 Kurtosis 2.214731

. sum bmiz

Variable | Obs Mean Std. Dev. Min Max

-------------+---------------------------------------------------------

bmiz | 1,182 .277584 1.609675 -23.66594 3.788386

. sum bmiz_change_peryr

Variable | Obs Mean Std. Dev. Min Max

-------------+---------------------------------------------------------

bmiz_chang~r | 1,182 .0307696 .9305899 -5.33685 3.892412

. codebook race

----------------------------------------------------------------------------------------------------------------------------------------------

race (unlabeled)

----------------------------------------------------------------------------------------------------------------------------------------------

type: numeric (float)

range: [1,4] units: 1

unique values: 4 missing .: 0/1,182

tabulation: Freq. Value

830 1

206 2

102 3

44 4

. tab sex_pedgrow_n r_bmiz_change_peryr , column freq chi2

+-------------------+

| Key |

|-------------------|

| frequency |

| column percentage |

+-------------------+

sex_pedgro | 5 quantiles of bmiz_change_peryr

w_n | 1 2 3 4 5 | Total

-----------+-------------------------------------------------------+----------

Male | 153 142 135 136 143 | 709

| 64.56 60.17 56.96 57.63 60.59 | 59.98

-----------+-------------------------------------------------------+----------

Female | 84 94 102 100 93 | 473

| 35.44 39.83 43.04 42.37 39.41 | 40.02

-----------+-------------------------------------------------------+----------

Total | 237 236 237 236 236 | 1,182

| 100.00 100.00 100.00 100.00 100.00 | 100.00

Pearson chi2(4) = 3.5525 Pr = 0.470

. tab causeesrd r_bmiz_change_peryr , column freq chi2

+-------------------+

| Key |

|-------------------|

| frequency |

| column percentage |

+-------------------+

| 5 quantiles of bmiz_change_peryr

causeesrd | 1 2 3 4 5 | Total

-----------+-------------------------------------------------------+----------

1 | 0 0 3 1 1 | 5

| 0.00 0.00 1.27 0.42 0.42 | 0.42

-----------+-------------------------------------------------------+----------

3 | 35 39 25 27 22 | 148

| 14.77 16.53 10.55 11.44 9.32 | 12.52

-----------+-------------------------------------------------------+----------

7 | 143 145 162 160 154 | 764

| 60.34 61.44 68.35 67.80 65.25 | 64.64

-----------+-------------------------------------------------------+----------

8 | 3 0 2 2 4 | 11

| 1.27 0.00 0.84 0.85 1.69 | 0.93

-----------+-------------------------------------------------------+----------

9 | 56 52 45 46 55 | 254

| 23.63 22.03 18.99 19.49 23.31 | 21.49

-----------+-------------------------------------------------------+----------

Total | 237 236 237 236 236 | 1,182

| 100.00 100.00 100.00 100.00 100.00 | 100.00

Pearson chi2(16) = 20.8083 Pr = 0.186

. tab currentmode r_bmiz_change_peryr , column freq chi2

+-------------------+

| Key |

|-------------------|

| frequency |

| column percentage |

+-------------------+

currentmod | 5 quantiles of bmiz_change_peryr

e | 1 2 3 4 5 | Total

-----------+-------------------------------------------------------+----------

0 | 117 98 87 81 81 | 464

| 49.37 41.53 36.71 34.32 34.32 | 39.26

-----------+-------------------------------------------------------+----------

1 | 120 138 150 155 155 | 718

| 50.63 58.47 63.29 65.68 65.68 | 60.74

-----------+-------------------------------------------------------+----------

Total | 237 236 237 236 236 | 1,182

| 100.00 100.00 100.00 100.00 100.00 | 100.00

Pearson chi2(4) = 16.1342 Pr = 0.003

. codebook tot_tx_pedgrow

----------------------------------------------------------------------------------------------------------------------------------------------

tot_tx_pedgrow TOTAL TRANSPLANTS FOR THIS PATIENT

----------------------------------------------------------------------------------------------------------------------------------------------

type: numeric (double)

range: [1,5] units: 1

unique values: 5 missing .: 132/1,182

tabulation: Freq. Value

794 1

208 2

42 3

5 4

1 5

132 .

. tab race r_bmiz_change_peryr , column freq chi2

+-------------------+

| Key |

|-------------------|

| frequency |

| column percentage |

+-------------------+

| 5 quantiles of bmiz_change_peryr

race | 1 2 3 4 5 | Total

-----------+-------------------------------------------------------+----------

1 | 159 164 166 172 169 | 830

| 67.09 69.49 70.04 72.88 71.61 | 70.22

-----------+-------------------------------------------------------+----------

2 | 54 38 36 39 39 | 206

| 22.78 16.10 15.19 16.53 16.53 | 17.43

-----------+-------------------------------------------------------+----------

3 | 16 21 23 19 23 | 102

| 6.75 8.90 9.70 8.05 9.75 | 8.63

-----------+-------------------------------------------------------+----------

4 | 8 13 12 6 5 | 44

| 3.38 5.51 5.06 2.54 2.12 | 3.72

-----------+-------------------------------------------------------+----------

Total | 237 236 237 236 236 | 1,182

| 100.00 100.00 100.00 100.00 100.00 | 100.00

Pearson chi2(12) = 13.1909 Pr = 0.355

. //here is cause of death 1 = cardiac; 2 = infectious; 3 = other

. tab causedeath r_bmiz_change_peryr, column freq chi2

+-------------------+

| Key |

|-------------------|

| frequency |

| column percentage |

+-------------------+

| 5 quantiles of bmiz_change_peryr

causedeath | 1 2 3 4 5 | Total

-----------+-------------------------------------------------------+----------

1 | 49 40 29 48 47 | 213

| 40.83 44.94 32.22 47.06 47.47 | 42.60

-----------+-------------------------------------------------------+----------

2 | 11 6 15 12 12 | 56

| 9.17 6.74 16.67 11.76 12.12 | 11.20

-----------+-------------------------------------------------------+----------

3 | 60 43 46 42 40 | 231

| 50.00 48.31 51.11 41.18 40.40 | 46.20

-----------+-------------------------------------------------------+----------

Total | 120 89 90 102 99 | 500

| 100.00 100.00 100.00 100.00 100.00 | 100.00

Pearson chi2(8) = 10.2424 Pr = 0.248

.

.

. codebook bmiz_cat_byhealth

----------------------------------------------------------------------------------------------------------------------------------------------

bmiz_cat_byhealth (unlabeled)

----------------------------------------------------------------------------------------------------------------------------------------------

type: numeric (float)

range: [0,2] units: 1

unique values: 3 missing .: 2/1,182

tabulation: Freq. Value

110 0

870 1

200 2

2 .

. tab bmiz_cat_byhealth, freq

bmiz_cat_by |

health | Freq. Percent Cum.

------------+-----------------------------------

0 | 110 9.32 9.32

1 | 870 73.73 83.05

2 | 200 16.95 100.00

------------+-----------------------------------

Total | 1,180 100.00

. gen diff = (wtdat-wtdat_lag)

. sum diff, detail

diff

-------------------------------------------------------------

Percentiles Smallest

1% 182 180

5% 212 181

10% 247 181 Obs 1,182

25% 301 181 Sum of Wgt. 1,182

50% 335 Mean 320.1684

Largest Std. Dev. 48.09528

75% 353 406

90% 364 410 Variance 2313.156

95% 371 426 Skewness -.9447333

99% 392 589 Kurtosis 4.386932

.

.

. sum ageyrs if r_bmiz_change_peryr ==1, detail

ageyrs

-------------------------------------------------------------

Percentiles Smallest

1% 3.75 3.5

5% 5.833333 3.5

10% 6.75 3.75 Obs 237

25% 10.58333 3.833333 Sum of Wgt. 237

50% 15.58333 Mean 14.1846

Largest Std. Dev. 4.510561

75% 18 19.75

90% 19 19.83333 Variance 20.34516

95% 19.41667 19.91667 Skewness -.7053707

99% 19.83333 19.91667 Kurtosis 2.278793

. sum ageyrs if r_bmiz_change_peryr ==2, detail

ageyrs

-------------------------------------------------------------

Percentiles Smallest

1% 3.916667 2.916667

5% 6 3.666667

10% 7 3.916667 Obs 236

25% 11.33333 4 Sum of Wgt. 236

50% 15.16667 Mean 14.12041

Largest Std. Dev. 4.38718

75% 17.83333 19.83333

90% 19.08333 19.91667 Variance 19.24735

95% 19.58333 19.91667 Skewness -.6668563

99% 19.91667 19.91667 Kurtosis 2.394204

. sum ageyrs if r_bmiz_change_peryr ==3, detail

ageyrs

-------------------------------------------------------------

Percentiles Smallest

1% 3.916667 3.416667

5% 5.666667 3.75

10% 7.583333 3.916667 Obs 237

25% 10.91667 3.916667 Sum of Wgt. 237

50% 14.25 Mean 13.80731

Largest Std. Dev. 4.270854

75% 17.66667 19.83333

90% 19 19.83333 Variance 18.2402

95% 19.41667 19.83333 Skewness -.4917526

99% 19.83333 19.91667 Kurtosis 2.335701

. sum ageyrs if r_bmiz_change_peryr ==4, detail

ageyrs

-------------------------------------------------------------

Percentiles Smallest

1% 4.166667 3.666667

5% 5.833333 3.666667

10% 7.416667 4.166667 Obs 236

25% 9.958333 4.166667 Sum of Wgt. 236

50% 14.625 Mean 13.69244

Largest Std. Dev. 4.448033

75% 17.83333 19.83333

90% 18.91667 19.83333 Variance 19.785

95% 19.25 19.91667 Skewness -.4286453

99% 19.83333 19.91667 Kurtosis 1.97633

. sum ageyrs if r_bmiz_change_peryr ==5, detail

ageyrs

-------------------------------------------------------------

Percentiles Smallest

1% 2.916667 2.833333

5% 3.583333 2.916667

10% 4.416667 2.916667 Obs 236

25% 8.708333 3 Sum of Wgt. 236

50% 13.04167 Mean 12.36158

Largest Std. Dev. 5.029091

75% 16.95833 19.75

90% 18.5 19.83333 Variance 25.29175

95% 19.08333 19.83333 Skewness -.3627941

99% 19.83333 19.91667 Kurtosis 1.951363

. sum ageyrs, detail

ageyrs

-------------------------------------------------------------

Percentiles Smallest

1% 3.5 2.833333

5% 5.083333 2.916667

10% 6.5 2.916667 Obs 1,182

25% 10.16667 2.916667 Sum of Wgt. 1,182

50% 14.58333 Mean 13.63388

Largest Std. Dev. 4.576938

75% 17.66667 19.91667

90% 18.91667 19.91667 Variance 20.94836

95% 19.41667 19.91667 Skewness -.5535223

99% 19.83333 19.91667 Kurtosis 2.214731

. //this tells you if difference across bmi categories is statistically significant

. kwallis ageyrs, by(r_bmiz_change_peryr)

Kruskal-Wallis equality-of-populations rank test

+----------------------------+

| r_bmiz~r | Obs | Rank Sum |

|----------+-----+-----------|

| 1 | 237 | 150365.50 |

| 2 | 236 | 147618.50 |

| 3 | 237 | 141804.50 |

| 4 | 236 | 140056.00 |

| 5 | 236 | 119308.50 |

+----------------------------+

chi-squared = 21.160 with 4 d.f.

probability = 0.0003

chi-squared with ties = 21.162 with 4 d.f.

probability = 0.0003

.

. sum bmiz_change_peryr, detail

bmiz_change_peryr

-------------------------------------------------------------

Percentiles Smallest

1% -2.709227 -5.33685

5% -1.316439 -4.923926

10% -.884198 -3.94802 Obs 1,182

25% -.3775484 -3.686019 Sum of Wgt. 1,182

50% -.0324555 Mean .0307696

Largest Std. Dev. .9305899

75% .3890209 3.369816

90% 1.024662 3.407591 Variance .8659976

95% 1.680856 3.632316 Skewness .0620038

99% 2.845954 3.892412 Kurtosis 7.158174

. sum bmiz_change_peryr if r_bmiz_change_peryr ==1, detail

bmiz_change_peryr

-------------------------------------------------------------

Percentiles Smallest

1% -3.94802 -5.33685

5% -2.709227 -4.923926

10% -1.984169 -3.94802 Obs 237

25% -1.316439 -3.686019 Sum of Wgt. 237

50% -.884198 Mean -1.129041

Largest Std. Dev. .7482562

75% -.6451786 -.5098013

90% -.5464989 -.5093522 Variance .5598873

95% -.5326872 -.5081235 Skewness -2.490119

99% -.5093522 -.5064686 Kurtosis 10.91803

. sum bmiz_change_peryr if r_bmiz_change_peryr ==2, detail

bmiz_change_peryr

-------------------------------------------------------------

Percentiles Smallest

1% -.5008954 -.504287

5% -.4870281 -.5027913

10% -.4490965 -.5008954 Obs 236

25% -.377069 -.5001936 Sum of Wgt. 236

50% -.2837538 Mean -.2971906

Largest Std. Dev. .1059873

75% -.2114755 -.1395964

90% -.160277 -.1383721 Variance .0112333

95% -.150322 -.1381826 Skewness -.2768407

99% -.1383721 -.1370686 Kurtosis 1.916521

. sum bmiz_change_peryr if r_bmiz_change_peryr ==3, detail

bmiz_change_peryr

-------------------------------------------------------------

Percentiles Smallest

1% -.1329371 -.134883

5% -.1179569 -.1340327

10% -.1071746 -.1329371 Obs 237

25% -.0729468 -.1322997 Sum of Wgt. 237

50% -.0323567 Mean -.0231604

Largest Std. Dev. .063332

75% .0257991 .0912746

90% .0659051 .0915234 Variance .0040109

95% .0849432 .0930244 Skewness .1320094

99% .0915234 .0933562 Kurtosis 1.931823

. sum bmiz_change_peryr if r_bmiz_change_peryr ==4, detail

bmiz_change_peryr

-------------------------------------------------------------

Percentiles Smallest

1% .0952729 .093809

5% .1065701 .0950114

10% .1247685 .0952729 Obs 236

25% .1840161 .0952802 Sum of Wgt. 236

50% .2778158 Mean .2954528

Largest Std. Dev. .1335665

75% .390239 .5572393

90% .5013104 .5574356 Variance .01784

95% .5298087 .5664244 Skewness .311945

99% .5574356 .5665167 Kurtosis 1.993824

. sum bmiz_change_peryr if r_bmiz_change_peryr ==5, detail

bmiz_change_peryr

-------------------------------------------------------------

Percentiles Smallest

1% .573306 .5694043

5% .5873466 .5716679

10% .6222285 .573306 Obs 236

25% .7429249 .5736935 Sum of Wgt. 236

50% 1.029256 Mean 1.312931

Largest Std. Dev. .7535791

75% 1.685056 3.369816

90% 2.540553 3.407591 Variance .5678815

95% 2.845954 3.632316 Skewness 1.26261

99% 3.407591 3.892412 Kurtosis 3.755569

. //this tells you if difference across bmi categories is statistically significant

. kwallis bmiz_change_peryr, by(r_bmiz_change_peryr)

Kruskal-Wallis equality-of-populations rank test

+----------------------------+

| r_bmiz~r | Obs | Rank Sum |

|----------+-----+-----------|

| 1 | 237 | 28203.00 |

| 2 | 236 | 83898.00 |

| 3 | 237 | 140304.00 |

| 4 | 236 | 195526.00 |

| 5 | 236 | 251222.00 |

+----------------------------+

chi-squared = 1133.760 with 4 d.f.

probability = 0.0001

chi-squared with ties = 1133.760 with 4 d.f.

probability = 0.0001

.

.

. sum medianincome if r_bmiz_change_peryr ==1, detail

Median

-------------------------------------------------------------

Percentiles Smallest

1% 19121.16 14176.76

5% 27520.16 16629

10% 32030.4 19121.16 Obs 237

25% 37733.54 19572.09 Sum of Wgt. 237

50% 48955.53 Mean 52052.65

Largest Std. Dev. 19509.07

75% 61279.99 102115

90% 81140.45 103050.9 Variance 3.81e+08

95% 92084.22 119550.9 Skewness .9985463

99% 103050.9 134723.2 Kurtosis 4.320751

. sum medianincome if r_bmiz_change_peryr ==2, detail

Median

-------------------------------------------------------------

Percentiles Smallest

1% 21481.56 7687.539

5% 27766.79 21151.14

10% 32480.09 21481.56 Obs 236

25% 38853.5 23648.31 Sum of Wgt. 236

50% 47771.22 Mean 53161.24

Largest Std. Dev. 19393

75% 64006.06 103050.9

90% 82845.26 105144 Variance 3.76e+08

95% 92041.71 108053.7 Skewness .73522

99% 105144 110531.1 Kurtosis 2.981055

. sum medianincome if r_bmiz_change_peryr ==3, detail

Median

-------------------------------------------------------------

Percentiles Smallest

1% 21959.83 21293.18

5% 27620.33 21388.23

10% 30871.88 21959.83 Obs 237

25% 39032.95 22410.64 Sum of Wgt. 237

50% 47500 Mean 53800.88

Largest Std. Dev. 21288.49

75% 65422.56 109321.5

90% 84272.6 121181.8 Variance 4.53e+08

95% 96179.22 125721.5 Skewness 1.140983

99% 121181.8 144254.7 Kurtosis 4.425453

. sum medianincome if r_bmiz_change_peryr ==4, detail

Median

-------------------------------------------------------------

Percentiles Smallest

1% 23362.97 16396.2

5% 28831.83 22603.52

10% 32323.04 23362.97 Obs 236

25% 39020.89 23444.09 Sum of Wgt. 236

50% 47497.52 Mean 52783.63

Largest Std. Dev. 20345.16

75% 61271.38 107914.8

90% 78667.04 121121.7 Variance 4.14e+08

95% 97009.16 137536.4 Skewness 1.4107

99% 121121.7 139899.6 Kurtosis 5.564909

. sum medianincome if r_bmiz_change_peryr ==5, detail

Median

-------------------------------------------------------------

Percentiles Smallest

1% 15614.66 10207.74

5% 26261.02 14176.76

10% 30362.53 15614.66 Obs 236

25% 38983.17 16114.87 Sum of Wgt. 236

50% 48006.16 Mean 53456.39

Largest Std. Dev. 23400.14

75% 63274.6 137077.1

90% 84178.59 146682.9 Variance 5.48e+08

95% 93605.3 152697.3 Skewness 1.518529

99% 146682.9 154254.6 Kurtosis 6.434586

. sum medianincome, detail

Median

-------------------------------------------------------------

Percentiles Smallest

1% 20729.7 7687.539

5% 27784.23 10207.74

10% 31621.12 14176.76 Obs 1,182

25% 38609.86 14176.76 Sum of Wgt. 1,182

50% 47903.39 Mean 53050.75

Largest Std. Dev. 20811.99

75% 63502.26 144254.7

90% 82885.54 146682.9 Variance 4.33e+08

95% 93464.54 152697.3 Skewness 1.223893

99% 119901.5 154254.6 Kurtosis 5.153141

.

. //this tells you if difference across bmi categories is statistically significant

. kwallis medianincome, by(r_bmiz_change_peryr)

Kruskal-Wallis equality-of-populations rank test

+----------------------------+

| r_bmiz~r | Obs | Rank Sum |

|----------+-----+-----------|

| 1 | 237 | 138083.00 |

| 2 | 236 | 141782.50 |

| 3 | 237 | 142386.50 |

| 4 | 236 | 138585.00 |

| 5 | 236 | 138316.00 |

+----------------------------+

chi-squared = 0.606 with 4 d.f.

probability = 0.9624

chi-squared with ties = 0.606 with 4 d.f.

probability = 0.9624

.

.

.

. table r_bmiz_change_peryr

----------------------

5 |

quantiles |

of |

bmiz_chan |

ge_peryr | Freq.

----------+-----------

1 | 237

2 | 236

3 | 237

4 | 236

5 | 236

----------------------

.

.

.

. tab r_bmiz_change_peryr sex_pedgrow_n, row freq chi2

+----------------+

| Key |

|----------------|

| frequency |

| row percentage |

+----------------+

5 |

quantiles |

of |

bmiz_chang | sex_pedgrow_n

e_peryr | Male Female | Total

-----------+----------------------+----------

1 | 153 84 | 237

| 64.56 35.44 | 100.00

-----------+----------------------+----------

2 | 142 94 | 236

| 60.17 39.83 | 100.00

-----------+----------------------+----------

3 | 135 102 | 237

| 56.96 43.04 | 100.00

-----------+----------------------+----------

4 | 136 100 | 236

| 57.63 42.37 | 100.00

-----------+----------------------+----------

5 | 143 93 | 236

| 60.59 39.41 | 100.00

-----------+----------------------+----------

Total | 709 473 | 1,182

| 59.98 40.02 | 100.00

Pearson chi2(4) = 3.5525 Pr = 0.470

.

. //you might want to combine some categories of esrd (e.g. CAKUT versus GN versus other)

. tab r_bmiz_change_peryr causeesrd, row freq chi2

+----------------+

| Key |

|----------------|

| frequency |

| row percentage |

+----------------+

5 |

quantiles |

of |

bmiz_chang | causeesrd

e_peryr | 1 3 7 8 9 | Total

-----------+-------------------------------------------------------+----------

1 | 0 35 143 3 56 | 237

| 0.00 14.77 60.34 1.27 23.63 | 100.00

-----------+-------------------------------------------------------+----------

2 | 0 39 145 0 52 | 236

| 0.00 16.53 61.44 0.00 22.03 | 100.00

-----------+-------------------------------------------------------+----------

3 | 3 25 162 2 45 | 237

| 1.27 10.55 68.35 0.84 18.99 | 100.00

-----------+-------------------------------------------------------+----------

4 | 1 27 160 2 46 | 236

| 0.42 11.44 67.80 0.85 19.49 | 100.00

-----------+-------------------------------------------------------+----------

5 | 1 22 154 4 55 | 236

| 0.42 9.32 65.25 1.69 23.31 | 100.00

-----------+-------------------------------------------------------+----------

Total | 5 148 764 11 254 | 1,182

| 0.42 12.52 64.64 0.93 21.49 | 100.00

Pearson chi2(16) = 20.8083 Pr = 0.186
